# Supplementary material for: Profiling aerosol optical, microphysical and hygroscopic properties in ambient conditions by combining in-situ andremote sensing
Source: Copernicus journal article supplement (doi:10.5194/amt-2016-193), 2016-07-18
Supplement: Supplementary file [file amt-2016-193-AC3-supplement.pdf]

1 **Profiling aerosol optical, microphysical and hygroscopic**  
2 **properties in ambient conditions by combining in-situ and**  
3 **remote sensing**

4  
5 **Alexandra Tsekeri<sup>1</sup>, Vassilis Amiridis<sup>1</sup>, Franco Marenco<sup>2</sup>, Athanasios Nenes<sup>3,4,5</sup>,**  
6 **Eleni Marinou<sup>1,6</sup>, Stavros Solomos<sup>1</sup>, Phil Rosenberg<sup>7</sup>, Jamie Trembath<sup>8</sup>, Graeme**  
7 **J. Nott<sup>8</sup>, James Allan<sup>9,10</sup>, Michael Le Breton<sup>9</sup>, Asan Bacak<sup>9</sup>, Hugh Coe<sup>9</sup>, Carl**  
8 **Percival<sup>9</sup>, and Nikolaos Mihalopoulos<sup>4</sup>**

9 [1]{IAASARS, National Observatory of Athens, Athens, Greece}

10 [2]{Satellite Applications, Met Office, Exeter, UK}

11 [3]{Schools of Earth and Atmospheric Sciences and Chemical and Biomolecular Engineering,  
12 Georgia Institute of Technology, Atlanta, Georgia, USA}

13 [4]{IERSD, National Observatory of Athens, Athens, Greece}

14 [5]{ICE-HT, Foundation for Research and Technology Hellas, Patras, Greece}

15 [6]{Laboratory of Atmospheric Physics, Aristotle University of Thessaloniki, Thessaloniki,  
16 Greece}

17 [7] {School of Earth and Environment, University of Leeds, Leeds, UK}

18 [8] {Facility for Airborne Atmospheric Measurements (FAAM), Cranfield, UK}

19 [9]{School of Earth, Atmospheric and Environmental Sciences, University of Manchester,  
20 Manchester, UK}

21 [10]{National Centre for Atmospheric Science, The University of Manchester, Manchester,  
22 UK}

23  
24  
25 Correspondence to: A. Tsekeri (atsekeri@noa.gr)

26  
27

## 1 **Abstract**

2 We present the **In-situ/Remote sensing aerosol Retrieval Algorithm (IRRA)** that combines  
3 airborne in-situ and lidar remote sensing data to retrieve vertical profiles of ambient aerosol  
4 optical, microphysical and hygroscopic properties employing the ISORROPIA II model for  
5 acquiring the particle hygroscopic growth. Here we apply the algorithm on data collected from  
6 the Facility for Airborne Atmospheric Measurements (FAAM) BAe-146 research aircraft  
7 during the ACEMED campaign in Eastern Mediterranean. Vertical profiles of aerosol  
8 microphysical properties have been derived successfully for an aged smoke plume near the city  
9 of Thessaloniki with aerosol optical depth of  $\sim 0.4$  at 532 nm, single scattering albedos of  $\sim 0.9$ -  
10  $0.95$  at 550 nm and typical lidar ratios for smoke of  $\sim 60$ - $80$  sr at 532 nm. IRRA retrieves highly  
11 hydrated particles above land, with 55% and 80% water volume content for ambient relative  
12 humidity of 80% and 90%, respectively. The proposed methodology is highly advantageous for  
13 aerosol characterization in humid conditions and can find valuable applications in aerosol-cloud  
14 interaction schemes. Moreover, it can be used for the validation of active space-borne sensors,  
15 as is demonstrated here for the case of CALIPSO.

16

## 17 **1 Introduction**

18 Liquid water is by far the most abundant species in atmospheric particulates, being on average  
19 2–3 times the total aerosol dry mass on a global average (e.g. Pilinis et al., 1995; Liao and  
20 Seinfeld, 2005). Both organic and inorganic compounds contained within aerosol can drive the  
21 formation of a liquid aerosol phase (e.g., Guo et al., 2016). Aerosol water uptake changes the  
22 particle size and refractive index with profound implications for radiative transfer and cloud  
23 formation (e.g., Quinn et al., 2005). For example, at a relative humidity (RH) of 90%, the  
24 scattering cross section can increase by a factor of 5 compared to that of the dry particle (Malm  
25 and Day, 2001). Because of this, liquid water uptake is the most important contributor to direct  
26 radiative cooling by aerosols (Pilinis et al., 1995; Hegg et al., 1997), currently estimated to  
27 range between  $-0.95$  and  $+0.05$   $\text{W m}^{-2}$  (IPCC, 2013). Aerosol liquid water plays also a pivotal  
28 role in secondary aerosol formation for inorganic and organic species by promoting the surface  
29 area for gas-particle partitioning and by providing the medium for chemical reactions (Seinfeld  
30 and Pandis, 2006; Ervens et al., 2011) that assist the formation of aerosol mass.

31 Acquiring the hydrated particle properties is far from trivial, especially when it comes to  
32 vertical profiling. In-situ techniques can provide vertically-resolved information when applied

1 by an airborne platform, a solution that although is costly and sparse over space and time, yields  
2 detailed information for particle properties. Unfortunately, the commonly used in-situ  
3 techniques can cause alterations in the particle ambient state even when minimally-invasive  
4 instruments are used (e.g. open-path optical sensors; Snider and Petters, 2008). To address these  
5 biases, ambient particle samples are first dried and then rehydrated in the controlled  
6 environment of an in-situ sensor; aerosol properties and changes thereof are then used to  
7 understand the behaviour of ambient aerosol for any meteorological state (Engelhart et al.,  
8 2011; Pikridas et al., 2012). In contrast to in-situ techniques, remote sensing is not invasive and  
9 may sample large atmospheric volumes, enabling an unprecedented spatial and temporal  
10 coverage for global aerosol monitoring. Passive remote sensing techniques provide columnar  
11 particle properties, while active sensors can provide vertically-resolved properties. A well-  
12 known active remote sensing instrument is the lidar (**L**ight **D**etection and **R**anging), a sensor  
13 that is capable of acquiring vertical profiles of the backscatter and extinction coefficients at one  
14 or more wavelengths. The ill-posed nature of the aerosol property retrieval remains the inherent  
15 disadvantage of the lidar technique, although considerable algorithmic developments have been  
16 achieved over the last decade. These include for example the employment of sophisticated  
17 multi-wavelength elastic/Raman lidar measurements in lidar stand-alone retrievals (e.g. Müller  
18 et al., 2015), or the combination of elastic lidar with sunphotometer measurements (e.g.  
19 Chaikovsky et al, 2015; Lopatin et al., 2013). Although these advancements have provided  
20 means towards more accurate aerosol profiling, still the lidar stand-alone retrievals work well  
21 only for fine particles while the lidar/sunphotometer retrievals do not fully resolve the particle  
22 microphysical property profiles; they rather provide only the particle concentration profile and  
23 consider a constant size distribution and refractive index for the whole atmospheric column.

24 An alternative hybrid approach for obtaining well-constrained ambient aerosol profiles is  
25 through the synergy of active remote sensing observations with concurrent airborne in-situ  
26 measurements. To date, such efforts focused mostly on low-humidity profiles, where there is  
27 no difference between the ambient remote sensing measurements and the in-situ measurements  
28 performed under dry conditions inside the instruments (e.g. Weinzierl et. al, 2009). High-  
29 humidity conditions have also been studied, but only for fine mode particle properties (e.g.  
30 Ziemba et al. 2013), as the coarse particle hygroscopic growth is not as easily constrained with  
31 in-situ airborne techniques, mainly due to sampling inlet losses. The IRRA approach presented  
32 here addresses these limitations through the combination of in-situ and active remote sensing  
33 measurements with hygroscopic modelling, making possible the vertical profiling of fine and

1 coarse particles even for humid conditions. For this purpose, the retrieval combines typical  
2 airborne in-situ instrumentation, measuring the dry particle size distribution and chemical  
3 composition, together with a simple backscatter lidar. The ambient remote sensing  
4 measurements are linked to the dry in-situ data through modelling of the particle hygroscopic  
5 growth with the ISORROPIA II model (e.g., Fountoukis and Nenes, 2007; Guo et al., 2015).

6 In the current study IRRA is applied on data collected in the framework of the EUFAR-  
7 ACEMED campaign (“evaluation of CALIPSO’s Aerosol Classification scheme over Eastern  
8 MEDiterranean”), during which the FAAM BAe-146 research aircraft performed two under-  
9 flights of the Cloud–Aerosol Lidar and Infrared Pathfinder Satellite Observation (CALIPSO)  
10 satellite. The Mediterranean is considered ideal for the application and evaluation of IRRA  
11 retrieval scheme, as almost all globally-relevant aerosol types are encountered in the region, i.e.  
12 dust storms from desert or semi-arid areas in Africa, fresh and aged smoke from biomass  
13 burning, maritime aerosols, biogenic emissions, and anthropogenic aerosols (e.g. Lelieveld et  
14 al., 2002).

15 IRRA methodology is presented in section 2, along with a detailed description of the airborne  
16 in-situ and lidar measurements acquired during the ACEMED campaign, as well as  
17 ISORROPIA II and other models used. Section 3 presents the IRRA results for the ACEMED  
18 flight over Thessaloniki, Greece, along with a comparison with the CALIPSO overpass  
19 products. In section 4 we discuss our findings, and finally in section 5 we provide our  
20 conclusions and the future prospects of this study.

21

## 22 **2 Data and methods**

23 IRRA methodology is based on the airborne remote sensing and in-situ synergy, utilizing  
24 backscatter lidar measurements, along with the size distribution, chemical composition,  
25 scattering and absorption in-situ measurements. Specifically for the ACEMED campaign,  
26 airborne active remote sensing observations were performed with the Leosphere ALS450 lidar  
27 system acquiring backscatter and depolarization profiles at 355 nm (Marengo et al., 2011;  
28 Chazette et al., 2012); the in-situ instruments (Table 1) included the TSI Integrating  
29 Nephelometer 3563 for measuring the particle scattering coefficient at 450, 550 and 700 nm,  
30 the Radiance Research Particle Soot Absorption Photometer (PSAP) for the absorption  
31 coefficient at 567 nm, the Passive Cavity Aerosol Spectrometer Probe 100-X (PCASP) and the  
32 1.129 Grimm Technik Sky-Optical Particle Counter (GRIMM) for measuring the particle

1 number size distribution, and the Aerodyne time-of-flight Aerosol Mass Spectrometer (AMS)  
2 for providing the aerosol chemical composition. Moreover, measurements of trace gases were  
3 acquired with the Chemical Ionization Mass Spectrometer (CIMS) and the fast fluorescence  
4 CO analyser, water vapour measurements were provided by the Water Vapour Sensing System  
5 2nd Generation (WVSS-II), along with temperature and pressure of the ambient air from the  
6 Rosemount deiced temperature sensor and the Reduced Vertical Separation Minimum system,  
7 respectively. More details about the instruments and measurements are given in section 2.2 with  
8 flight details given in section 3.1.

## 9 **2.1 IRRA methodology for retrieving the ambient particle microphysics**

10 IRRA characterizes the ambient aerosol profiles by utilizing both in-situ and remote sensing  
11 data through an automated iterative scheme shown schematically in Fig. 1. Briefly, the in-situ  
12 measured dry particle parameters are “rehydrated” using the ISORROPIA II model to obtain  
13 an estimate of the ambient particle size distribution and refractive index. Then, the dry particle  
14 scattering and absorption coefficients, together with the ambient particle extinction and  
15 backscatter coefficients, are calculated with the Mie theory (Mie, 1908; Bohren and Huffman,  
16 1983). The retrieval is considered successful only if the calculations reproduce the airborne in-  
17 situ and lidar measurements; if this is not the case the input parameters are adjusted and the  
18 process is repeated.

19 For each straight level run (SLR) at a fixed altitude, the in-situ dry particle size distribution and  
20 refractive index acquired from the PCASP, GRIMM and AMS measurements are used in the  
21 retrieval as a first guess for the dry particle characteristics. Then, the dry particle scattering and  
22 absorption coefficients are reproduced using the Mie code of Bohren and Huffman (1983),  
23 assuming spherical particles in the atmosphere. The in-situ optical instrumentation (i.e TSI  
24 nephelometer and PSAP) are affected from inlet and pipeline losses, resulting in coarse particle  
25 undersampling, as described in section 2.3.3. For this reason, at this stage we consider a bimodal  
26 lognormal size distribution (Eq. 1, red line in Fig. 2) that is truncated up to 1.5  $\mu\text{m}$  in radius  
27 (black dash line in Fig. 2).

$$\frac{dN}{d\ln(r)_d} = \frac{N_{fd}}{\sqrt{2\pi} \ln(\sigma_{fd})} \exp\left(-\frac{(\ln(r) - \ln(r_{mfd}))^2}{2\ln(\sigma_{fd})^2}\right) + \frac{N_{cd}}{\sqrt{2\pi} \ln(\sigma_{cd})} \exp\left(-\frac{(\ln(r) - \ln(r_{mcd}))^2}{2\ln(\sigma_{cd})^2}\right) \quad (1)$$

1  $\frac{dN}{d\ln(r)_d}$  is the dry particle number size distribution,  $N_{fd}, N_{cd}$  are the total number concentrations,  
 2  $r_{mfd}, r_{mcd}$  are the geometric mean radii and  $\sigma_{fd}, \sigma_{cd}$  are the geometric standard deviation of  
 3 fine and coarse modes, respectively.

4 Moreover, the dry particle refractive index is assumed to be spectrally constant and common  
 5 for fine and coarse particles. This is necessary since the information content in IRRA is not  
 6 sufficient to resolve the refractive index spectral and size dependence. As a first guess we use  
 7 the refractive index calculated from the in-situ chemical composition measurements, but this  
 8 value is only an approximation and is expected to change, since the in-situ data do not provide  
 9 a full chemical characterization of the particles.

10 The next step, after defining the dry particle size distribution and refractive index, is to estimate  
 11 the ambient particle properties by modelling their hygroscopic growth with the ISORROPIA II  
 12 model (a detailed model description is given in section 2.3.1). The ambient particle number size  
 13 distribution is parameterized similarly to the dry particle number size distribution, considering  
 14 that the geometric mean radius equals to the dry geometric mean radius multiplied by the  
 15 hygroscopic growth factor  $f_g$  of the corresponding mode (Eq. 2, 3):

$$r_{mfa} = f_{gf} r_{mfd} \quad (2)$$

$$r_{mca} = f_{gc} r_{mcd} \quad (3)$$

16 The subscripts  $f$  and  $c$  denote the fine and coarse particle modes, respectively. The  
 17 corresponding  $f_g$  values are calculated from the water uptake predicted with ISORROPIA II.  
 18  $r_{mfa}$  and  $r_{mca}$  are the geometric mean radii of the modes. An example of an ambient size  
 19 distribution retrieval is shown in Fig. 2 (blue line) for RH=81%.

20 The real and imaginary parts of the ambient particle refractive index are calculated as following:

$$n_{af,c}(\lambda) = (1 - f_{wf,c}) n_{df,c} + f_{wf,c} n_w(\lambda) \quad (4)$$

$$k_{af,c}(\lambda) = (1 - f_{wf,c}) k_{df,c} + f_{wf,c} k_w(\lambda) \quad (5)$$

1 where  $n_{af,c}(\lambda)$  and  $k_{af,c}(\lambda)$  are the real and imaginary parts of the ambient refractive index,  
 2  $n_{df,c}$  and  $k_{df,c}$  are the same for dry particles,  $n_w(\lambda) + ik_w(\lambda)$  is the water refractive index,  $\lambda$   
 3 is the wavelength and  $f_{wf,c}$  are the water volume fractions in total volume of the ambient  
 4 particles, provided by ISORROPIA II.

5 At the last stage, the measured optical properties are reproduced with Mie calculations, and  
 6 closure is achieved between measurements and calculations. These properties are the  
 7 backscatter and extinction coefficients at 355 nm calculated from the ambient properties, and  
 8 the scattering coefficients at 450, 550, 700 nm and absorption coefficient at 567 nm calculated  
 9 from the dry properties. The closure is achieved through the minimization of a cost function,  
 10 using the Trust-Region-Reflective optimization algorithm (based on the interior-reflective  
 11 Newton method described in Coleman and Li, 1994; 1996). The cost function is the sum of the  
 12 squares of the differences between the measured and calculated optical properties, weighted by  
 13 their “importance” for the retrieval, as described in more detail in Appendix A. Briefly, starting  
 14 from a first guess for the parameters of the dry particle size distribution and refractive index,  
 15 the optimization algorithm iteratively searches the parameter space for a set that minimizes the  
 16 cost function. The search is set to stop after few (~10) iterations, after which there is no  
 17 considerable change in the cost function reduction or in the step size for the current study.  
 18 Ideally, in case of quantified uncertainties in the measurements and the parameters, the search  
 19 stops when the cost function reduction is smaller than the uncertainty of the measurements or  
 20 the search step size is smaller than the uncertainty of the parameter space (Dubovik, 2004). At  
 21 the end, the retrieval errors can be quantified using the measurement uncertainties and the  
 22 Jacobian matrix of the final optimization step (Rodgers, 2000; Dubovik, 2004).

## 23 **2.2 Data**

### 24 **2.2.1 Airborne lidar**

25 The airborne active remote sensing observations used in IRRA for the ACEMED campaign,  
 26 were performed with the nadir-pointing Leosphere ALS450 lidar system, capable of acquiring  
 27 particle backscatter and depolarization profiles at 355 nm (Marenco et al., 2011; Chazette et al.,  
 28 2012). The measurements were acquired at night-flight, and the absence of daylight allowed  
 29 the airborne lidar to measure with good signal to noise ratio (SNR). Lidar signals were measured

1 with an integration time of 2 s and a vertical resolution of 1.5 m, and are smoothed vertically  
2 to a 45 m vertical resolution in order to improve SNR further. The vertical profiles of lidar  
3 signals are then cloud-screened by eliminating those in the presence of clouds using the  
4 thresholds in Allen et al. (2014).

5 The particle backscatter and extinction coefficients from the ALS450 system observations are  
6 calculated following the solution by Klett (1985), assuming a variable extinction-to-backscatter  
7 ratio or lidar ratio (LR) at 355 nm with height, and an aerosol extinction coefficient at 355 nm  
8 at a reference height in the far range. Both LR and reference extinction are calculated from the  
9 retrieved ambient size distribution and refractive index at the corresponding heights.

## 10 **2.2.2 Airborne in-situ**

### 11 **2.2.2.1. Particle drying from in-situ instruments**

12 The sampled air is dried by adiabatic compression during the sampling through the inlets of the  
13 aircraft in-situ instruments, and by the cabin temperature and radiant heat from the lights in the  
14 instruments. There is a chance this drying is only partial, with some residual water remaining  
15 in the sample (e.g. Strapp et al., 1992; Snider and Petters, 2008). The partial drying is estimated  
16 from the instrument RH (and the particle chemical composition) and is taken into account in  
17 modelling the particle hygroscopic growth with ISORROPIA II. Unfortunately, instrument RH  
18 measurements are provided only for the nephelometer, with values ranging at ~25-40%. We  
19 assume that these values are the same for PSAP. For PCASP and GRIMM optical particle  
20 counter (OPC) measurements we consider a low RH of 30%, based on the work of Strapp et al.  
21 (1992). Strapp et al (1992) indicated that particles with radius less than 5  $\mu\text{m}$  should be  
22 dehydrated due to the residence time of 0.1-0.3 s in the low humidity environment of the  
23 instrument. Even if this is not the case, the RH of 30% has a minor effect on particle hydration  
24 for the samples analysed here, causing ~1% growth in particle size. For the sake of simplicity  
25 herein we call the partially dried particles as “dry particles”.

### 26 **2.2.2.2. Particle size distribution measurements**

27 The number size distributions were measured with PCASP and GRIMM OPCs. Both  
28 instruments measure the particle number size distribution by impinging light on the air sample  
29 and inferring the number and size of the particles from the light each particle scatters over a  
30 specified angular range (Rosenberg et al., 2012; Heim et al., 2008). PCASP operates a He-Ne



1 laser at 0.6328  $\mu\text{m}$ , measuring the particle scattering at 35-120° (primary angles) and 60° -145°  
2 (secondary angles), providing a (nominal) size range of 0.05–1.5  $\mu\text{m}$  radius. GRIMM uses the  
3 light of a laser diode at 0.683  $\mu\text{m}$ , measuring at 30° -150° (primary angles) and 81-99°  
4 (secondary angles), providing a (nominal) size range of 0.125-16  $\mu\text{m}$  radius. The number of  
5 particles equals to the scattered light pulses, since each particle in the sample results in a light  
6 pulse. The particle size is calculated comparing the height and width of the pulse with that from  
7 calibration standards of known size distribution and refractive index, assuming that the sample  
8 has the same refractive index as the calibration standard. This is the “nominal size” and the true  
9 size can be then derived correcting for the particle refractive index, as described in Rosenberg  
10 et al. (2012). For the PCASP we use the calibration standards from the Fennec 2011 campaign  
11 (Rosenberg et al., 2012), and for the GRIMM we generate calibration standards assuming a bin  
12 width uncertainty of 5%, based upon the manufacturers’ specification. A detailed description  
13 of handling and correcting the OPC size distribution data is provided in Appendix B.

14 The PCASP was wing-mounted on the BAe-146 aircraft, whereas the GRIMM was internally  
15 mounted and connected with a Rosemount inlet, sampling the air through different inlets and  
16 pipelines. The effects of inlet efficiencies (enhancement/losses) and losses along the pipelines  
17 varied with altitude and ambient size distribution, affecting mainly the coarse mode particles  
18 (Ryder et al., 2013; Trembath et al., 2012). Inlet efficiency corrections are applied to PCASP  
19 using the methods of Belyaev and Levin (1974). The GRIMM OPC was not corrected for  
20 particle losses, and we expect the main losses to be for the largest particles.

21 As a validation of correctly handling the PCASP and GRIMM data, we compare the derived  
22 PCASP and GRIMM number size distributions (after converting them to volume size  
23 distributions) with the ambient volume size distributions provided by AERONET  
24 measurements on the days before and after the BAe-146 aircraft night flight (Fig. 3). Note that  
25 the AERONET does not provide vertically-resolved products, but rather the effective-column  
26 volume size distribution with units  $\mu\text{m}^3\mu\text{m}^{-2}$ . For a direct comparison with PCASP and  
27 GRIMM data (in  $\mu\text{m}^3\text{cm}^{-3}$ ) we divide the AERONET size distribution with the aerosol layer  
28 height (derived by the lidar measurements to be equal to  $\sim 3.5$  km). The OPC data uncertainties  
29 in the plot of Fig. 3 are calculated considering the refractive index uncertainty (Rosenberg et  
30 al. 2012) and counting statistics (see Appendix B). For fine mode there is a very good agreement  
31 among the two OPCs, but this is not the case for particles with radius  $>1.5$   $\mu\text{m}$ . The AERONET  
32 volume size distributions are similar to in-situ measurements for the fine mode, with the

1 AERONET observations before the flight to be within  $\sim\pm 60\%$  of the PCASP and GRIMM  
2 particle volume for particles with radius  $<1.5 \mu\text{m}$ . Similar results are shown in Haywood et al.  
3 (2003) for 0.1-1.0  $\mu\text{m}$  radius range, for their fresh smoke aerosol plumes. For particles with  
4 radius  $>1.5 \mu\text{m}$  the agreement is worse, especially for GRIMM data, owing to the Rosemount  
5 inlet enhancement of the super-micron particles (as described in Trembath et al. (2012)). This  
6 is to be expected, since for sizes  $>1.5 \mu\text{m}$  the agreement between PCASP and GRIMM  
7 deteriorates as well. In any case, the comparison with AERONET data should be done with  
8 caution, since it refers to ambient particles, and the measurements are offset by  $\sim 9$  hours.  
9 Moreover, differences can be also attributed to the AERONET size distribution cut-off at 15  
10  $\mu\text{m}$ . In general though, the good agreement for particles with radius  $<1.5 \mu\text{m}$  for all three  
11 datasets indicates that the airborne in-situ measurements of PCASP and GRIMM instruments  
12 provide trustworthy data for this size range, fitted to be used in our analysis.

### 13 **2.2.2.3. Chemical composition and refractive index**

14 The aerosol composition and mass distribution of volatile and semi-volatile components of  
15 aerosols as a function of particle size (with radius from 0.025 to 0.4  $\mu\text{m}$ ) were measured with  
16 the AMS instrument (Allan et al., 2003; Morgan et al., 2010; Athanasopoulou et al., 2015).  
17 AMS measures the mass loadings of the refractive aerosol fractions: sulphates, nitrates,  
18 ammonium, chloride and organics. Figure 4 shows the AMS measurements for the ACEMED  
19 case analysed here, indicating mixtures of inorganics/organics in the range of  $\sim 50/50$  (the  
20 chloride mass concentration is very low and is not shown in the plot). Although the data refer  
21 mainly to fine mode particles, in our analysis we assume that they are representative of the  
22 coarse mode as well, since there are no measurements for the coarse particle chemical  
23 composition (the “coarse mode” denotes here to particles with radius  $>0.8 \mu\text{m}$  -see Fig. 3).

24 The chemical composition provided by the AMS can be used to estimate the particle refractive  
25 index, assuming that the particles are internally mixed and applying a volume mixing law to  
26 account for the contributions of the corresponding chemical groups (Highwood et al., 2012).  
27 For the calculations we need to consider a characteristic refractive index for each chemical  
28 group as well as a density to convert the AMS-measured dry mass to volume. Here we use the  
29 values provided in Highwood et al. (2012) (see Table 2): We assume the sulphate, nitrate and  
30 ammonium particles to be in the form of ammonium sulfate ( $(\text{NH}_4)_2\text{SO}_4$ ) and ammonium  
31 nitrate ( $\text{NH}_4\text{NO}_3$ ), with density and refractive index provided by Toon (1976) and Weast  
32 (1985), respectively. For organics, we consider the properties of the organic carbon of the

1 Swanee River Fulvic Acid, as reported in Dinar et al. (2006) and Dinar et al. (2008). This  
2 approach is quite approximate, especially considering the refractive index variability of the  
3 “organics” group. In addition, the aerosol sampled is influenced by biomass burning (mainly  
4 due to high HCN and CO concentrations measured –see section 3.1) and may be strongly  
5 absorbing – this means that the uncertainty on the imaginary part is large. For these reasons the  
6 AMS-derived refractive index is used only as a first guess for the refractive index calculation  
7 with IRRA algorithm, as described in the methodology section 2.1. A similar approach was  
8 followed from McConnell et al. (2010), although focusing mainly on the imaginary part  
9 retrieval.

#### 10 **2.2.2.4. Scattering and absorption**

11 The dry particle scattering coefficients at 450, 550 and 700 nm were measured on-board with  
12 the TSI Integrating Nephelometer 3563 and the absorption coefficient at 567 nm was measured  
13 with the PSAP (Orgen 2010). The scattering coefficient measurements are corrected for angular  
14 truncation, temperature and pressure (Anderson and Orgen 1998; Turnbull 2010). The  
15 absorption measurements are corrected for pressure, flow rate and spot size effects (Bond et al.,  
16 1999; Orgen 2010; Turnbull 2010). Both instruments were connected to modified Rosemount  
17 inlets (Trembath et al., 2012), suffering from inlet enhancement/losses as well as losses along  
18 the pipelines, and consequently did not measure the scattering properties of the whole size range  
19 of particles. For this reason, we consider a sampling cut-off for particles with radius  $>1.5 \mu\text{m}$   
20 for the TSI nephelometer and PSAP measurements.

#### 21 **2.2.2.5. Ambient relative humidity**

22 The ambient RH is estimated from the water vapour measurements from the WVSS-II  
23 instrument (Fleming and May, 2004). The WVSS-II uses a near-infrared tunable diode laser  
24 absorption spectrometer. Two WVSS-II instruments were mounted on the BAe-146 aircraft,  
25 sampling the air through the standard flush inlet and a modified Rosemount inlet, respectively.  
26 The water vapor measurements provided by the two instruments can be different (Vance et al.,  
27 2015), but for the case presented here the differences are small, of the order of less than 2% in  
28 ambient RH, thus what we used in our analysis is their average. The ambient RH calculation  
29 from the WVSS-II water vapour measurements is provided in Appendix C.

## 1 2.3 Models

### 2 2.3.1 Hygroscopic growth model

3 ISORROPIA II (Nenes et al., 1997; Fountoukis and Nenes, 2007) models the phase state and  
4 composition of aerosol composed of Na, NH<sub>4</sub>, NO<sub>3</sub>, Cl, SO<sub>4</sub>, Mg, K, Ca and H<sub>2</sub>O in equilibrium  
5 with a gas phase composed of NH<sub>3</sub>, HNO<sub>3</sub> and HCl. The model performance has been evaluated  
6 against comprehensive ambient datasets over a wide range of acidities, RH, and temperatures  
7 (Fountoukis and Nenes, 2006; 2007; Hennigan et al., 2015; Guo et al., 2015; Weber et al., 2016;  
8 Guo et al., 2016). In our analysis, we also consider the contribution of hygroscopic organics to  
9 the water uptake of the aerosol using the approach of Guo et al. (2015).

10 ISORROPIA II takes as input the aerosol precursor composition, along with the temperature,  
11 pressure and RH of the sample inside the instrument, and the temperature, pressure and RH of  
12 the ambient atmosphere, and it calculates the hygroscopic growth of fine and coarse modes.  
13 Since we assume the same chemical composition for fine and coarse particles, the hygroscopic  
14 growth is the same for both. The calculations involve various uncertainties, mainly from the  
15 hygroscopicity of the organic matter, the uncertainties and/or the variability in the RH  
16 measurements and the size-dependence of composition (that is not considered) within each  
17 mode and between modes.

18 Overall, ISORROPIA II provides an excellent estimation of the particle hygroscopic growth,  
19 especially at high RHs where the hydration has the greatest effect on the particle properties  
20 (e.g., Guo et al., 2015). The cumulative effect of particle composition on water uptake can be  
21 expressed using the hygroscopicity parameter  $\kappa$  (Petters and Kreidenweis, 2007), derived from  
22  $f_g$  and RH as in Eq. 6:

$$\kappa = \frac{f_g^3 - 1}{RH/100 - RH} \quad (6)$$

23 For mixtures of inorganics/organics in the range of ~50/50, as is the case here, the  
24 hygroscopicity parameter is 0.2 – 0.3 for RH>80% (Petters and Kreidenweis, 2007; Chang et  
25 al., 2010; Mikhailov et al., 2013). Airborne measurements performed above the Aegean Sea  
26 during the Aegean-Game campaign (Bezantakos et al., 2013), which was coupled with  
27 ACEMED, showed similar values for  $\kappa$ . Over multiple years, measurements of particle  
28 hygroscopicity at the South Aegean site of Finokalia, Crete also exhibit very similar values  
29 (Bougiatioti et al., 2009; 2011; 2016; Kalkavouras et al., 2016). ISORROPIA II retrieves

1  $\kappa \approx 0.25$  for  $RH > 80\%$ , and lower values for smaller RHs (see Fig. 5). Given that the  
2 hygroscopic growth data reported by Bezantakos et al., (2013) corresponds to  $RH > 80\%$ , this  
3 consistency between predictions and observations is a strong indication that the internal mixture  
4 assumption applies, and that the AMS composition data is representative of the ambient aerosol.  
5 Moreover, the drop in predicted hygroscopicity for  $RH < 80\%$  is consistent with observed  
6 behaviour for aerosol particles (e.g. Guo et al., 2015).

### 7 **2.3.2 Source-receptor simulations**

8 In order to investigate the origin of the aerosol plumes in the scene analysed here, a number of  
9 backward and forward Lagrangian simulations of particle dispersion are performed with  
10 FLEXPART-WRF model (Brioude et al., 2013). These simulations are driven by WRF\_ARW  
11 (Skamarock et al., 2008) hourly fields at  $4 \times 4$  km horizontal resolution. Initial and boundary  
12 conditions for the WRF model are from the National Centers for Environmental Prediction  
13 (NCEP) final analysis (FNL) product at  $1^\circ \times 1^\circ$  resolution. The sea surface temperature (SST) is  
14 the daily NCEP SST analysis at  $0.5^\circ \times 0.5^\circ$  resolution. Furthermore, in order to derive  
15 information of smoke dispersion for the forward runs, fire hot spots are obtained from the  
16 Moderate Resolution Imaging Spectroradiometer (MODIS) Fire Information for Resource  
17 Management System (FIRMS) database.

### 18 **2.4 CALIPSO product**

19 The derived ambient particle properties during the ACEMED campaign are used to evaluate  
20 the CALIPSO products. CALIPSO satellite carries CALIOP, an elastic backscatter lidar  
21 operating at 532 and 1064 nm, equipped with a depolarization channel at 532 nm, delivering  
22 global vertical profiles of aerosols and clouds. The CALIPSO Level-2 (L2) aerosol layer  
23 products used in the current study are generated by automated algorithms and provide a  
24 description of the aerosol layers in respect to horizontal and vertical extend, along with the  
25 particle backscatter and extinction coefficient profiles. A detailed description of the L2  
26 algorithms is provided in Vaughan et al. (2004) and Winker et al. (2009).

27 The CALIPSO Vertical Feature Mask (VFM) L2 product (Vaughan et al. 2004), classifies  
28 aerosols and clouds based on their optical properties and external information of geographical  
29 location, surface type and season (Omar et al, 2005; 2009). The classification scheme  
30 differentiates six subtypes of aerosol particles: polluted continental, smoke, dust, polluted dust,  
31 clean marine and clean continental. An example of the attenuated backscatter coefficient and

1 the associated VFM classification, for the case analysed here, is shown in Fig. 7b and c. Burton  
2 et al. (2013) have validated the CALIPSO classification scheme using collocated airborne High  
3 Spectral Resolution Lidar (HSRL) measurements during 109 CALIPSO under-flights and  
4 reported a relatively trustworthy classification for mineral dust (80%) which falls to 62% for  
5 marine particles, 54% for polluted continental, 35% for polluted dust and only 13% for smoke.

6

## 7 **3 Results**

### 8 **3.1 ACEMED flight overview**

9 The scope of the ACEMED EUFAR campaign was the evaluation of the CALIPSO aerosol  
10 classification scheme using high quality airborne aerosol measurements along with ground-  
11 based lidar, sunphotometric and in-situ observations. ACEMED was clustered with the Aegean-  
12 Game (**A**egean **P**ollution: **G**aseous and **A**erosol airborne **M**Easurements) campaign (Tombrou  
13 et al., 2015), held from 31 August to 9 September 2011 with the FAAM  
14 (<http://www.faam.ac.uk/>) BAe-146 research aircraft, based in the island of Crete (Greece). Two  
15 CALIPSO under-flights were performed for ACEMED, on 2 September and during the night  
16 between 8 and 9 September. Here only the latter flight is considered (FAAM flight B644, Fig.  
17 6), due to higher SNR lidar measurements during the night.

18 The BAe-146 aircraft approached Thessaloniki area from the Southeast, flying at an altitude of  
19 ~5 km above mean sea level. Once in the operating area, it flew on a SSW to NNE transect  
20 back and forth between 40N and 41.2N, sampling at different altitudes over both land and ocean  
21 (coastline at 40.6N, see Fig. 6). A first SLR was done at 5.1 km altitude, in order to fly above  
22 the aerosol layers so as to provide full profiles with the use of the on-board lidar. Then, the  
23 aircraft flew a series of SLRs at altitudes 3.9, 3.2, 2.7, 2.1, 1.8 and 1.3 km, and in each of these,  
24 data have been collected with the in-situ instrumentation. The aircraft then profiled the  
25 atmosphere, returning to high level (4.8 km) for an additional remote sensing survey in the  
26 shape of a box pattern around the sampling area. The lidar measurements used in the current  
27 analysis were acquired when the aircraft was flying at 5.1 and 4.8 km, and the in-situ  
28 measurements were acquired at 3.2, 2.7, 2.1, 1.8 and 1.3 km (at 5 and 3.9 km the in-situ data  
29 showed no presence of particles).

30 Figure 7 shows the vertical profiling of the atmosphere along the flight, as depicted in the range-  
31 corrected backscatter signal at 355 nm from the airborne lidar (Fig. 7a), and the curtain of the

1 attenuated backscatter coefficient as this is provided by CALIPSO L1 product at 532 nm (Fig.  
2 7b). The airborne lidar depolarization measurements were low (not shown here), indicating  
3 spherical particles in the scene. In both Fig. 7a and b there is strong indication of cloud  
4 formation at ~3 km in part of the flight above land (shown as white features). Large RHs have  
5 also been observed in the airborne WVSS-II RH measurements in Fig. 8 at that height, where  
6 the cloudy parts above land show RHs of 92-98%. These cloudy parts are excluded from the  
7 CALIPSO aerosol subtype VFM product (see Fig. 7c) and the corresponding lidar vertical  
8 profiles are excluded from our analysis. At the cloud-free parts the RH is higher above land  
9 (80-90% at 2-3.5 km and 60% below 2 km) and lower above ocean (70-80% at 2-3 km and  
10 <60% below 2 km) (Fig. 8).

11 FLEXPART source-receptor simulations show the advection of smoke from biomass burning  
12 towards the region of interest in Fig. 9. The wind direction over the Balkans was mainly NW.  
13 However due to the complex topography at the area and the development of low-level thermal  
14 circulations along the coastlines (sea-breeze), the wind pattern at the lowest 1 km in the  
15 troposphere was rapidly changing with time, affecting also the dispersion of smoke. Such wind  
16 channelling and sea-breeze formation is adequately resolved in the finer WRF grids. The  
17 emission sensitivity (residence time) for a 24-hour backwards simulation and for two  
18 representative locations (one over land and one over ocean) is shown in Fig. 9a. The red  
19 triangles denote the position of the active fires during this period as obtained by the MODIS  
20 fire product (<https://earthdata.nasa.gov/earth-observation-data/near-real-time/firms>). These  
21 results identify six hot spots that fall within the emission sensitivity area and so are most likely  
22 responsible for the smoke transport over the region of interest.

23 Taking into account the positions and times of detection of the six emission points we perform  
24 a forward simulation of smoke dispersion, assuming constant emission rates of  $0.15 \text{ kg s}^{-1}$  and  
25 constant smoke injection heights at 1 km. The vertical cross section of smoke total particulate  
26 matter (TPM) is shown in Fig. 9b (the location of the cross section is indicated by the dashed  
27 black line in Fig. 9a). In order to compensate for the possible time lags in modelled smoke  
28 transport we compute the average TPM concentration for the period 00:00-02:00 UTC from the  
29 corresponding 30-minute model outputs (i.e., 00:00, 00:30, 01:00, 01:30 and 02:00 UTC).  
30 Figure 9b shows elevated smoke plumes over the northern land part at about 2-3 km and near  
31 the surface (the latter though being below the FAAM BAe-146 flight level). The results indicate

1 also the presence of a lower (1-2.5 km) smoke plume over the ocean. The elevated smoke  
2 plumes above the southern land part in Fig. 9b are out of the FAAM BAe-146 flight range.

3 The smoke presence above Thessaloniki is also supported by the biomass burning proxies HCN  
4 and CO measurements, acquired with CIMS (Le Breton et al., 2013) and the fast fluorescence  
5 CO analyser (Gerbig et al., 1999), respectively. The HCN is used as a biomass burning tracer  
6 (Lobert et al., 1990) since its lifetime in the smoke plume can potentially exceed several weeks.  
7 As indicated in Le Breton et al. (2013), HCN concentrations higher than six standard deviations  
8 from the median background concentration are highly correlated with CO concentrations  
9 indicating biomass burning plumes. Indeed, the HCN concentrations seem to exceed the smoke  
10 plume detection threshold at altitudes from 2 to 3.5 km (Fig. 10). These values are strongly  
11 correlated with the corresponding CO concentrations, with a correlation of  $R^2 = 0.8$  (not shown  
12 here), strongly indicating the smoke presence. The measurements agree well with source-  
13 receptor simulations in Fig. 9, except for the lower part of the smoke plume above the ocean,  
14 which is not depicted in the HCN data.

15 Although the CALIPSO L2 aerosol classification product identifies the smoke over  
16 Thessaloniki city (at the land part of the flight), it seems that at the southern part of the scene,  
17 above ocean, the algorithm misclassifies the layers almost completely (Fig. 7c). We believe that  
18 this is partly due to the different classification criteria for smoke above land versus above ocean,  
19 as these are defined by Omar et al. (2009) for the CALIPSO classification scheme. More  
20 specifically, as can be seen in Fig. 2 in Omar et al. (2009) the non-depolarizing aerosol plumes  
21 are classified as smoke plumes above ocean only if they are “elevated layers” (a layer is  
22 considered “elevated” when the layer base  $> 2.5$  km, or if  $0.5 \text{ km} < \text{base} < 2.5 \text{ km}$  then  $\text{top} >$   
23  $4 \text{ km}$  or  $\text{depth} > 2 \text{ km}$ ; J. Tackett, personal communication). More analysis on the CALIPSO  
24 “hard limit” that can be potentially imposed on the aerosol classification at coastal areas due to  
25 the different land/ocean classification criteria, can be found in the work of Kanitz et al. (2014).  
26 Due to this discontinuity we decided to perform our analysis at the land and ocean parts  
27 separately, in order to examine the possible differences present in CALIPSO L2 product. For  
28 the ocean retrieval we use the area from 40 to 40.6 degrees latitude (marked with the light blue  
29 rectangle in Fig. 7c), whereas for land we use only the two cloud-free 5-km segments  
30 (corresponding to CALIPSO L2 5-km-profiles) indicated with the orange rectangle in Fig. 7c,  
31 in the area from 40.6 to 41.2 degrees latitude.



## 1 **3.2 Flight above land**

2 Using the combination of airborne in-situ and active remote sensing measurements with the  
3 IRRRA retrieval scheme described in section 2.1, we retrieve profiles of the ambient particle  
4 properties above land and ocean. For the retrieval above land we use the lidar measurements  
5 taken at 5 km and the in-situ measurements acquired during the SLRs at 3.2, 2.7 and 1.8 km.  
6 The comparisons between the measured and calculated dry and ambient particle optical  
7 properties show both excellent agreement (Fig. 11 and Table D1 in Appendix D), with the  
8 relative differences to be below 5 %. The only exception is the lidar extinction coefficient at  
9 1.8 km, with ~10 % relative difference. This may be due to the incoherence of the lidar and in-  
10 situ measurements there, due to temporal variability of the atmospheric properties, with the  
11 lidar measurements to be an average of the flight segment at ~5 km between 00:20 and 00:27  
12 UTC, and the in-situ measurements at 1.8 km to refer at 01:38 to 01:42 UTC (see Fig. 6b).

13 Overall, as seen in Fig. 11 and 12 the very high RHs that exceed 90% at 3.2 km and 80% at 2.7  
14 km (see Fig. 8), have a large hydration effect on the ambient particle optical and microphysical  
15 properties. Figure 11 shows quite vividly the hydration effect on the ambient backscatter and  
16 extinction coefficients at 355 nm, at 2.7 and 3.2 km, whereas at 1.8 km the effect is small. The  
17 comparison of dry (red dots) with ambient calculations (blue dots) for the backscatter and  
18 extinction coefficients, highlight the deficiency of dry in-situ measurements to reproduce the  
19 ambient particle optical properties in humid conditions.

20 A similar conclusion can be drawn from the retrieved ambient (number and volume) size  
21 distributions provided in Fig. 12 and Table 3, and the respective refractive indices in Table 4.  
22 The hydration effect of both fine and coarse modes is notable, especially for the high-RH layers  
23 at 2.7 and 3.2 km, with a water content of 55% and 80% of the total volume, respectively. The  
24 retrieved dry particle fine mode is well-fitted to the measured PCASP and GRIMM data, with  
25 95% of the calculated size distribution data points to be within two error bars of the measured  
26 data. For the coarse mode the fit is also acceptable, although the high uncertainty in the in-situ  
27 measurements does not allow a definite conclusion.

28 The retrieved ambient lidar ratio at 355 nm of ~70-90 sr and the dry SSA at 550 nm of ~0.9-  
29 0.95 (Fig. 11) indicate the presence of absorbing particles along the flight path, in good  
30 agreement with the source-receptor simulations, as well as with the HCN and CO airborne in-  
31 situ measurements, all showing the advection of smoke over Thessaloniki area. The retrieved  
32 geometric mean radius and standard deviation of the fine mode are similar to measurements

1 detailed in Johnson et al. (2016) for the SAMBBA, DABEX and SAFARI-2000 campaigns for  
2 aged smoke. The retrieved dry particle refractive indices of  $1.54-1.6 + i0.008-0.021$  are within  
3 the range of typical values for biomass burning particles, and the corresponding ambient  
4 refractive indices ( $1.38-1.55 + i 0.002-0.019$ ) are close to the AERONET 8-year global aerosol  
5 climatology of Dubovik et al. (2002). More specifically, Dubovik et al. (2002) report a range  
6 of  $1.47\pm 0.03$  to  $1.52\pm 0.01$  for the real part and  $0.00093\pm 0.003$  to  $0.021\pm 0.004$  for the imaginary  
7 part.

### 8 **3.3 Flight above ocean**

9 For the retrieval above ocean we use the airborne lidar measurements at 5 km and the in-situ  
10 measurements from the SLRs at 3.2, 2.7, 2.1 and 1.3 km. The calculated optical properties  
11 reproduce well the measurements, as shown in Fig. 13 (and in Table D2 of Appendix D), with  
12 most of the relative differences to be below 15%. For the lidar backscatter and extinction  
13 coefficients at the lower SLRs at 2.1 and 1.3 km these differences are larger and range at ~30-  
14 100%. As explained for the retrieval above land as well, this may be due to the temporal  
15 variability of the atmosphere, resulting in the lidar seeing a different aerosol plume than the in-  
16 situ measurements, especially for the lower SLRs (see Fig. 6b).

17 The results support the presence of smoke mixed with other aerosol types (e.g. urban pollution),  
18 with the ambient lidar ratio at 355 nm to be ~55-75 sr and the dry particle SSA at 550 nm to be  
19 ~0.9-0.95. Figure 14 and Table 5 show the retrieved (number and volume) size distributions of  
20 dry and ambient particles, at different altitudes and Table 6 shows the corresponding refractive  
21 indices. As with the land retrieval, the fine mode PCASP and GRIMM measurements are well-  
22 fitted, whereas for the coarse mode the uncertainty is higher. The hydration effect is mostly  
23 obvious at 3.2 km (RH of ~80% with 40% water content in the particle total volume), whereas  
24 it is very small at 1.3 km (RH at ~55%).

25 The retrieved geometric mean radius and standard deviation of the fine mode are smaller than  
26 the values reported in Johnson et al., (2016) indicating mixing with finer aerosol (e.g. urban  
27 pollution). The retrieved dry refractive indices of  $\sim 1.50-1.66 + i0.01-0.019$  have similar values  
28 with the retrieved refractive indices above land, although the real part of 1.66 at 2.7 km is  
29 higher. Moreover, the ambient refractive index values of  $\sim 1.48-1.6 + i0.006-0.015$  are  
30 comparable to AERONET climatological values (Dubovik et al., 2002), indicating the smoke  
31 particle presence above the ocean as well.

### 1 **3.4 Comparison with CALIPSO L2 product**

2 Using the retrieved ambient size distribution and refractive index at different altitudes we  
3 calculate the ambient backscatter, extinction coefficient and lidar ratio at 532 nm and compare  
4 them with the corresponding CALIPSO L2 products. Above land, the smoke layer at ~2-3.5 km  
5 is correctly identified by the CALIPSO aerosol classification scheme (Fig. 7c), and a prescribed  
6 LR at 532 nm of 70 sr (assigned for smoke particles) is used for the CALIPSO L2 backscatter  
7 and extinction coefficient retrievals. Figure 15 presents the results for the above-land retrieval,  
8 showing good agreement with the CALIPSO L2 product. The small differences seen are within  
9 the spatial variability and can be due to the time difference of CALIPSO overpass (at 00:30  
10 UTC) and the longer FAAM BAe-146 flight (at 00:05-01:45 UTC). The LRs at 532 nm  
11 calculated with the retrieved ambient size distributions and refractive indices are 70-80 sr,  
12 supporting the presence of the smoke particles. The optical properties are calculated also using  
13 the dry particle size distribution and refractive index (red circles in Fig. 15) to highlight the  
14 problems that arise when using dry in-situ measurements for satellite validation for cases of  
15 high RH.

16 Over the ocean the retrieved ambient LRs at 532 nm at ~60-75 sr are lower than over land,  
17 indicating smoke particles mixed with other aerosol types. CALIPSO detects the aerosols  
18 correctly, but does not classify them as smoke (except only for one 5-km profile), and as shown  
19 in Fig. 7c, it classifies the particles either as polluted dust (LR=65 sr), or polluted continental  
20 (LR=70 sr) or marine aerosol (LR=20 sr), resulting in variable and lower LRs (25-70 sr). The  
21 mean LR is close to 60 sr, thus the mean backscatter and extinction coefficients are not  
22 excessively affected by this misclassification. The CALIPSO misclassification is due to the  
23 constraint applied in the algorithm to identify only the elevated layers as smoke layers above  
24 the ocean.

### 25 **3.5 Scattering growth factor**

26 The enhancement of aerosol scattering due to the hygroscopic growth is shown in Fig. 17 with  
27 the scattering growth factor at 532 nm. The scattering growth factor is the ratio of the ambient  
28 aerosol scattering coefficient, to the dry aerosol scattering coefficient. Figure 17 shows that the  
29 scattering at RH=94% is almost 4 times larger than in the dry state. These values fall within the  
30 range of Köhler curves for aged smoke particles and can be used in climate models for the  
31 estimation of hydrated aged smoke particle scattering (e.g. Johnson et al., 2016).

1

## 2 **4 Discussion**

3 The results presented here are very encouraging for the IRRA retrieval scheme performance.  
4 First, IRRA succeeds to reproduce both dry in-situ and ambient remote sensing measurements,  
5 even in humid conditions of  $RH > 80-90\%$ , by considering both dry and ambient particle states  
6 in the retrieval scheme and by effectively modelling the particle hygroscopic growth the  
7 ISORROPIA II model. Second, IRRA manages to provide the complete set of the particle  
8 microphysical properties, overcoming the deficiencies in the in-situ measurements due to the  
9 insufficient coarse mode size distribution and chemical composition sampling. We do not claim  
10 that the coarse mode retrieval is highly accurate with IRRA, but at least it closely reproduces  
11 the measurements and provides similar results to the climatological values of biomass burning  
12 particles, for the smoke plume case we analysed here. A more complete set of inputs, as in-situ  
13 coarse mode sampling and multi-wavelength lidar measurements, should increase the retrieval  
14 input information content and provide more accurate results. Third, IRRA retrieval is not  
15 gravely affected by possible uncertainties in the in-situ measured microphysical properties,  
16 since these are only used as a first guess in the iterative retrieval scheme. The unknown coarse  
17 mode chemical composition is an exception, since it directly affects the estimation of the coarse  
18 mode hygroscopic growth in the ISORROPIA II model.

19

## 20 **5 Conclusions**

21 IRRA utilizes successfully the airborne active remote sensing and in-situ measurements in order  
22 to provide a consistent characterization of the ambient aerosol at different altitudes, using  
23 typical airborne instruments employed by the FAAM BAe-146 aircraft flight. The retrieved  
24 ambient properties found to be mostly consistent also with the collocated CALIPSO L2 product.  
25 Specifically, smoke plumes are identified along the flight path, which are detected from  
26 CALIPSO classification scheme above land, but not above ocean.

27 One of the main shortfalls of the case analysed here is the large uncertainty in the airborne in-  
28 situ measurements regarding the coarse particle size distribution and chemical composition. In  
29 future IRRA applications, in-situ particle sizers achieving high accuracy measurements of the  
30 coarse mode should be employed, along with filter sampling of the coarse particles. We should

1 note though that despite of the limited coarse mode information, our retrieval provides plausible  
2 results for the coarse particles as well, for the case presented here.

3 The achievement of IRRA is the overall successful profiling of the ambient aerosol  
4 microphysical, optical and hygroscopic properties utilizing the combination of dry particle  
5 property measurements, active remote sensing and ISORROPIA II hygroscopic growth  
6 modelling, all in one retrieval scheme. The potential of IRRA lies beyond the case study  
7 analysed here, providing an effective aerosol characterization in ambient conditions of high  
8 importance for aerosol/cloud interaction, radiative transfer and climate studies.

9 We should highlight that IRRA is optimized with the measurement set acquired during the  
10 ACEMED campaign, but this is not a limiting factor of its applicability. The basic concept of  
11 combining vertically-resolved in-situ and active remote sensing measurements can be satisfied  
12 using a different measurement strategy as well. For example, after applying minor changes,  
13 IRRA can combine vertically-resolved in-situ measurements from aircraft or less-costly  
14 unmanned aerial vehicle (UAV) platforms, with ground-based or satellite lidar measurements.

15 IRRA can also be developed further in the future, to include ground-based or airborne  
16 polarization measurements which should help to decrease the aerosol retrieval uncertainty,  
17 especially for the particle refractive index (Mishchenko and Travis, 1997). Another feature we  
18 plan to implement is the retrieval of non-spherical particle properties, employing non-spherical  
19 particle scattering codes in the algorithm (e.g. the T-matrix code as in Dubovik et al. (2006), or  
20 the Advanced Discrete Dipole Approximation as in Gasteiger et al. (2011)). This will extend  
21 the applicability of IRRA to dust particle characterization as well.

22 For the application presented here, it has been shown that it is feasible with IRRA to evaluate  
23 space-borne profiling measurements. Beyond CALIPSO, IRRA can be further applied for the  
24 validation of the new NASA CATS mission but also future ESA missions like ADM-Aeolus  
25 and EarthCARE.

26

## 27 **Appendix A: IRRA optimization retrieval scheme**

28 IRRA retrieval methodology shown in Fig. 1 is automated utilizing the non-linear least-squares  
29 solver “lsqcurvefit” of MATLAB. The lsqcurvefit calculates the dry and ambient particle size  
30 distributions and refractive indices that minimize the difference between the calculated and  
31 measured optical properties in a least-squares sense (Eq. A1).

1

$$\min \|F(SD_d, m_d, f_{gf,c}, f_{wf,c}) - y\|_2^2 = \min \sum_i \left( F(SD_d, m_d, f_{gf,c}, f_{wf,c})_i - y_i \right)^2 \quad (\text{A1})$$

$$y = \{sc_{450}, sc_{550}, sc_{700}, abs_{565}, \alpha_{355}, \beta_{355}, NC_{0.8}, NC_{1.1}\} \quad (\text{A2})$$

$$F(SD_d, m_d, f_{gf,c}, f_{wf,c}) = \left\{ \begin{array}{l} F_{sc_{450}}(SD_d, m_d), F_{sc_{550}}(SD_d, m_d), F_{sc_{700}}(SD_d, m_d), F_{abs_{565}}(SD_d, m_d), \\ F_{\alpha_{355}}(SD_d, m_d, f_{gf,c}, f_{wf,c}), F_{\beta_{355}}(SD_d, m_d, f_{gf,c}, f_{wf,c}), F_{NC_{0.8}}(SD_d), F_{NC_{1.1}}(SD_d) \end{array} \right\} \quad (\text{A3})$$

$$SD_d = \{r_{mfd}, \sigma_{fd}, N_{fd}, r_{mcd}, \sigma_{cd}, N_{cd}\} \quad (\text{A4})$$

2

3 The retrieval is performed for each height separately. In Eq. A1, the summation over “ $i$ ” denotes  
 4 the different optical properties,  $y$  is the vector of the measured optical properties (Eq. A2) and  
 5  $F$  is the vector of the calculated optical properties (Eq. A3).  $SD_d$  is the vector of the dry size  
 6 distribution parameters (Eq. A4),  $m_d$  is the dry particle refractive index and  $f_{gf,c}, f_{wf,c}$  are the  
 7 hygroscopic growth and water volume fraction of fine and coarse ambient particles. The  
 8 retrieved parameters are the  $SD_d$  and  $m_d$ , whereas  $f_{gf,c}, f_{wf,c}$  provided by ISORROPIA II.

9 The  $y$  vector contains the in-situ measurements of the scattering coefficients at 450, 550 and  
 10 700 ( $sc_{450}, sc_{550}$  and  $sc_{700}$ , respectively), the absorption coefficient at 565 nm ( $abs_{565}$ ), as  
 11 well as the lidar measurements of extinction ( $\alpha_{355}$ ) and backscatter coefficient at 355 nm ( $\beta_{355}$ ).  
 12 In order for the retrieval not to be under-constrained, with less measurements than retrieved  
 13 parameters,  $y$  also contains the in-situ measured number concentration of dry particles at 0.8  
 14 and 1.1  $\mu\text{m}$  ( $NC_{0.8}$  and  $NC_{1.1}$ ). We use these coarse particle concentration values to constrain  
 15 more effectively the coarse mode retrieval, for which the in-situ measurements provide  
 16 accepted accuracy for sizes  $<1.5 \mu\text{m}$  (radius) (see discussion in Section 2.2.2).

17  $F$  vector contains the corresponding calculated values of  $y$ :  $F_{sc_{450}}, F_{sc_{550}}, F_{sc_{700}}$  and  $F_{abs_{565}}$  are  
 18 the scattering coefficients at 450, 550 and 700 nm and the absorption coefficient at 565 nm,  
 19 calculated from the dry particle number size distribution ( $SD_d$ ) and refractive index ( $m_d$ ),

1 utilizing Mie scattering calculations. Moreover,  $F_{\alpha_{355}}$  and  $F_{\beta_{355}}$  are the extinction and  
2 backscatter coefficients at 355 nm, calculated from the ambient number size distribution  
3 (derived from  $SD_d$  and  $f_{gf,c}$ , as in Eq. 2, 3) and refractive index (derived from  $m_d$  and  $f_{wf,c}$ ,  
4 as in Eq. 4, 5), with Mie scattering calculations. Finally,  $F_{NC_{0.8}}$  and  $F_{NC_{1.1}}$  are the values of  $SD_d$   
5 at 0.8 and 1.1  $\mu\text{m}$ .

6 The lsqcurvefit function employs the Trust-Region-Reflective optimization algorithm (based  
7 on the interior-reflective Newton method described in Coleman and Li, 1994; 1996) to  
8 minimize the cost function in Eq. A1. For the first iteration the parameters  $SD_d$  and  $m_d$  are set  
9 equal to a first guess, derived from the in-situ measurements. Subsequently, the algorithm  
10 searches for a set of parameters that minimizes the cost function. The minimization is done  
11 using a simpler function (defined by the first two terms of the Taylor approximation of the cost  
12 function) which models reasonably well the cost function behaviour in a “trust region” around  
13 the parameter set. A trial step is then computed by minimizing the modelled function. If the  
14 cost function is minimized as well, then the parameter set is updated using the trial step, and  
15 the trust region is expanded. Otherwise, the parameter set remains unchanged, the trust region  
16 is shrunk and the trial computation is repeated. The optimization procedure stops after  
17 predefined stopping criteria are reached. These may include the minimum cost function value,  
18 the minimum size of the trial step or a maximum number of iterations. The first two criteria are  
19 defined from the input measurement and the retrieved parameter uncertainties, respectively,  
20 which are not available for the current analysis. Thus, for the case analyzed here, we used a  
21 maximum number of iterations as the stopping criterion.

22 Moreover, the algorithm has the capability to use constrains for the lower and upper bounds of  
23 the retrieved parameters. We utilize this feature for the dry particle fine and coarse mode  
24 parameters, so as the retrieved parameters are not very different than the in-situ measurements.  
25 The dry particle refractive index is also constrained, so as to be within realistic values, with the  
26 real part from 1.3 to 1.7 and the imaginary part from 0 to 0.1. These values cover well the range  
27 of values provided from the worldwide aerosol climatology from 8-year AERONET data by  
28 Dubovik et al. (2002).

29 Last, the fitted parameters of  $y$  do not have all the same importance for our retrieval. More  
30 specifically, we are not interested in reproducing with high accuracy the number concentration  
31 measurements at 0.8 and 1.1  $\mu\text{m}$  ( $NC_{0.8}$  and  $NC_{1.1}$ ), or at least not as much as the measured  
32 optical properties. For this reason we “weight” the fit, by first normalizing to 1 each parameter

1 in  $y$  (dividing it with its value) and then multiplying with a weight that is a measure of the  
2 importance of the parameter fitting. The same multiplication factors are applied on the  
3 parameters of  $F$  vector. For the case analysed here we used weights of 1 for the optical  
4 properties and of 0.1 for the number concentrations at 0.8 and 1.1  $\mu\text{m}$ . The “weighting” of the  
5 fit can be very useful in the general case of combining measurements of different accuracies  
6 and it has been used in other retrievals in the literature (e.g. Dubovik and King, 2000). The  
7 weights should be derived based on the measurement accuracy, but if this is not easy to define  
8 (as is the case here), even qualitative numbers of “more” or “less” confidence in the  
9 measurements can help the retrieval.

## 11 **Appendix B: Size distribution data handling and calibration**

12 The number size distribution data from PCASP and GRIMM instruments come in the form of  
13 number of particles, per  $\text{cm}^3$ , per size bin. The number concentration for each size bin is  
14 normalized by  $d\ln(r_{max}) - d\ln(r_{min})$  ( $r_{min}$  and  $r_{max}$  refer to the minimum and maximum bin  
15 radius, respectively) to get the log-normal number size distribution  $dN/d\ln(r)$ . The log-normal  
16 volume size distribution  $dV/d\ln(r)$  is then calculated by multiplying  $dN/d\ln(r)$  with the volume  
17 of the particles in each bin.

18 The data are also inspected for spurious values, using the associated counting error, which for  
19 each size bin is defined as the inverse square root of the number of particles in the bin. The data  
20 associated with counting errors larger than 0.3 (corresponding to less than three particles in the  
21 size bin) are screened out. Moreover, the data are corrected for the refractive index assumption  
22 using the true refractive index and calibration standards, with the mieconscat and the  
23 cstodconverter software (<http://sourceforge.net/projects/mieconscat/> and  
24 <http://sourceforge.net/projects/cstodconverter/>, respectively), as described in Rosenberg et al.  
25 (2012) For this correction we assume that the particles are homogeneous and spherical. The  
26 uncertainty for the bin width is provided from the cstodconverter software and the uncertainty  
27 in the volume of the bin is calculated using the uncertainty in the bin width and the counting  
28 uncertainty of each bin.

## 30 **Appendix C: RH calculation**



1 The ambient RH is calculated from the WVSS-II water vapour volume mixing ratio ( $WV_{VMR}$ )  
 2 measurements and the ambient pressure ( $P$ ) measurements as following:

3

$$RH = \frac{WV_{VMR} P}{e} 100 \quad (C1)$$

4 where the  $WV_{VMR}$  is in  $m^3m^{-3}$ ,  $P$  is in  $hPa$ ,  $e$  (in  $hPa$ ) is the vapour pressure of water  
 5 calculated from the temperature ( $T$ ) measurements (in  $C$ ) as in Lowe and Ficke (1974):

6

$$e = a_0 + T \left( a_1 + T \left( a_2 + T \left( a_3 + T \left( a_4 + T \left( a_5 + a_6 T \right) \right) \right) \right) \right) \quad (C2)$$

7 with  $a_0 = 6.107799961$ ,  $a_1 = 4.436518521 \cdot 10^{-1}$ ,  $a_2 = 1.428945805 \cdot 10^{-2}$ ,  $a_3 =$   
 8  $2.650648471 \cdot 10^{-4}$ ,  $a_4 = 3.031240396 \cdot 10^{-6}$ ,  $a_5 = 2.034080948 \cdot 10^{-8}$  and  $a_6 =$   
 9  $6.136820929 \cdot 10^{-11}$ .

10

## 11 **Appendix D: Measured and retrieved optical properties**

12 Table D1. Measured versus calculated (bold) in-situ measurements of the dry particle scattering  
 13 coefficient at 450, 550 and 700 nm and SSA at 550 nm, and remote sensing measurements of  
 14 the ambient backscatter and extinction coefficients at 355 nm, above land. The spatial  
 15 (horizontal) variability of the measurements is provided as the standard deviation around the  
 16 mean value.

| Height<br>(km) | Airborne in-situ           |                            |                            | SSA at<br>550 nm | Airborne remote sensing    |                            |
|----------------|----------------------------|----------------------------|----------------------------|------------------|----------------------------|----------------------------|
|                | Scattering<br>coefficient  | Scattering<br>coefficient  | Scattering<br>coefficient  |                  | Backscatter<br>coefficient | Extinction<br>coefficient  |
|                | at 450 nm<br>( $km^{-1}$ ) | at 550 nm<br>( $km^{-1}$ ) | at 700 nm<br>( $km^{-1}$ ) |                  | at 355 nm<br>( $km^{-1}$ ) | at 355 nm<br>( $km^{-1}$ ) |
| 3.2            | 0.076±0.002                | 0.054±0.002                | 0.032±0.002                | 0.95±0.01        | 0.004                      | 0.310                      |

|     |              |              |              |             |              |              |
|-----|--------------|--------------|--------------|-------------|--------------|--------------|
|     | <b>0.074</b> | <b>0.054</b> | <b>0.034</b> | <b>0.95</b> | <b>0.004</b> | <b>0.307</b> |
| 2.7 | 0.082±0.004  | 0.055±0.003  | 0.033±0.002  | 0.91±0.01   | 0.002        | 0.192        |
|     | <b>0.080</b> | <b>0.056</b> | <b>0.033</b> | <b>0.91</b> | <b>0.002</b> | <b>0.200</b> |
| 1.8 | 0.071±0.004  | 0.051±0.002  | 0.031±0.002  | 0.90±0.01   | 0.001        | 0.099        |
|     | <b>0.070</b> | <b>0.051</b> | <b>0.031</b> | <b>0.90</b> | <b>0.001</b> | <b>0.108</b> |

1

2 Table D2. As for Table D1, for the retrieval above ocean.

|             | Airborne in-situ                                     |                                                      |                                                      | Airborne remote sensing |                                                       |                                                      |
|-------------|------------------------------------------------------|------------------------------------------------------|------------------------------------------------------|-------------------------|-------------------------------------------------------|------------------------------------------------------|
| Height (km) | Scattering coefficient at 450 nm (km <sup>-1</sup> ) | Scattering coefficient at 550 nm (km <sup>-1</sup> ) | Scattering coefficient at 700 nm (km <sup>-1</sup> ) | SSA at 550 nm           | Backscatter coefficient at 355 nm (km <sup>-1</sup> ) | Extinction coefficient at 355 nm (km <sup>-1</sup> ) |
| 3.2         | 0.070±0.011                                          | 0.049±0.008                                          | 0.030±0.005                                          | 0.93±0.03               | 0.003                                                 | 0.151                                                |
|             | <b>0.072</b>                                         | <b>0.053</b>                                         | <b>0.033</b>                                         | <b>0.94</b>             | <b>0.003</b>                                          | <b>0.144</b>                                         |
| 2.7         | 0.070±0.017                                          | 0.050±0.012                                          | 0.030±0.008                                          | 0.91±0.02               | 0.002                                                 | 0.111                                                |
|             | <b>0.077</b>                                         | <b>0.056</b>                                         | <b>0.035</b>                                         | <b>0.92</b>             | <b>0.002</b>                                          | <b>0.121</b>                                         |
| 2.1         | 0.083±0.007                                          | 0.060±0.005                                          | 0.038±0.004                                          | 0.91±0.01               | 0.003                                                 | 0.155                                                |
|             | <b>0.089</b>                                         | <b>0.067</b>                                         | <b>0.044</b>                                         | <b>0.92</b>             | <b>0.002</b>                                          | <b>0.153</b>                                         |
| 1.3         | 0.116±0.005                                          | 0.085±0.004                                          | 0.053±0.003                                          | 0.92±0.01               | 0.001                                                 | 0.089                                                |
|             | <b>0.110</b>                                         | <b>0.086</b>                                         | <b>0.058</b>                                         | <b>0.93</b>             | <b>0.002</b>                                          | <b>0.168</b>                                         |

3

4

5

## 6 Acknowledgements

7 The research leading to these results received funding from the European Community's Seventh  
8 Framework Programme (FP7/2007-2013) under grant agreement n°227159 (EUFAR: European

1 Facility for Airborne Research in Environmental and Geo-sciences) and the UK Natural  
2 Environment Research Council [Grant ref: NE/E018092/1]. Airborne data was obtained using  
3 the BAe-146-301 Atmospheric Research Aircraft [ARA] flown by Directflight Ltd and  
4 managed by the Facility for Airborne Atmospheric Measurements [FAAM], which is a joint  
5 entity of the Natural Environment Research Council [NERC] and the Met Office. This research  
6 has received funding from the European Union's Horizon 2020 research and innovation  
7 programme under grant agreement No 654109. The publication was supported by the  
8 European Union Seventh Framework Programme (FP7-REGPOT-2012-2013-1), in the  
9 framework of the project BEYOND, under grant agreement no. 316210 (BEYOND– Building  
10 Capacity for a Centre of Excellence for EO-based monitoring of Natural Disasters).  
11 Athanasios Nenes acknowledges support from a Georgia Power Faculty Scholar Chair and a  
12 Cullen-Peck Faculty Fellowship.

13 The authors would also like to acknowledge the contribution of Jim Haywood, Alan Vance and  
14 Kate Turnbull from the UK Met Office, Jason Tackett from the CALIPSO Lidar Science  
15 Working Group at NASA Langley Research Center and Ioannis Biniotoglou from IAASARS,  
16 National Observatory of Athens.

17

18

## 1 **References**

- 2 Allan, J. D., Jimenez, J. L., Williams, P. I., Alfarra, M. R., Bower, K. N., Jayne, J. T., Coe, H.,  
3 and Worsnop, D. R.: Quantitative sampling using an Aerodyne Aerosol Mass Spectrometer.  
4 Part 1: Techniques of data interpretation and error analysis, *Journal of Geophysical Research-*  
5 *Atmospheres*, 108(D3), 4090, doi:10.1029/2002JD002358, 2003. Allen, G., Illingworth, S. M.,  
6 O'Shea, S. J., Newman, S., Vance, A., Bauguitte, S. J.-B., Marengo, F., Kent, J., Bower, K.,  
7 Gallagher, M. W., Muller, J., Percival, C. J., Harlow, C., Lee, J., and Taylor, J. P.: Atmospheric  
8 composition and thermodynamic retrievals from the ARIES airborne TIR-FTS system – Part 2:  
9 Validation and results from aircraft campaigns, *Atmos. Meas. Tech.*, 7, 4401-4416,  
10 doi:10.5194/amt-7-4401-2014, 2014.
- 11 Amiridis, V., Marinou, E., Tsekeri, A., Wandinger, U., Schwarz, A., Giannakaki, E., Mamouri,  
12 R., Kokkalis, P., Binietoglou, I., Solomos, S., Herekakis, T., Kazadzis, S., Gerasopoulos, E.,  
13 Proestakis, E., Kottas, M., Balis, D., Papayannis, A., Kontoes, C., Kourtidis, K.,  
14 Papagiannopoulos, N., Mona, L., Pappalardo, G., Le Rille, O., and Ansmann, A.: LIVAS: a 3-  
15 D multi-wavelength aerosol/cloud database based on CALIPSO and EARLINET, *Atmos.*  
16 *Chem. Phys.*, 15, 7127-7153, doi:10.5194/acp-15-7127-2015, 2015.
- 17 Anderson, T. L. and Ogren, J. A.: Determining aerosol radiative properties using the TSI 3563  
18 integrating nephelometer, *Aerosol Sci. Technol.*, 29, 57–69, 1998.
- 19 Athanasopoulou, E., Protonotariou, A. P., Bossioli, E., Dandou, A., Tombrou, M., Allan, J. D.,  
20 Coe, H., Mihalopoulos, N., Kalogiros, J., Bacak, A., Sciare, J., and Biskos, G.: Aerosol  
21 chemistry above an extended archipelago of the eastern Mediterranean basin during strong  
22 northern winds, *Atmos. Chem. Phys.*, 15, 8401-8421, 10.5194/acp-15-8401-2015, 2015.
- 23 Belyaev, S. P., and Levin, L. M.: Investigation of aerosol aspiration by photographing particle  
24 tracks under flash illumination, *Journal of Aerosol Science*, 3(2), 127–140, 1972.
- 25 Bezantakos, S., Barmounis, K., Giamarelou, M., Bossioli, E., Tombrou, M., Mihalopoulos,  
26 N., Eleftheriadis, K., Kalogiros, J., D. Allan, J., Bacak, A., Percival, C. J., Coe, H., and Biskos,  
27 G.: Chemical composition and hygroscopic properties of aerosol particles over the Aegean Sea,  
28 *Atmos. Chem. Phys.*, 13, 11595-11608, doi:10.5194/acp-13-11595-2013, 2013.
- 29 Bohren, C. F. and Huffman, D. R.: *Absorption and Scattering of Light by Small Particles*, John  
30 Wiley & Sons, Inc., New York, 1983.

1 Bond, T. C., Anderson, T. L., and Campbell, D.: Calibration and intercomparison of filter-based  
2 measurements of visible light absorption by aerosols, *Aerosol Sci. Technol.*, 30, 582–600,  
3 doi:10.1080/027868299304435, 1999.

4 Brioude, J., Arnold, D., Stohl, A., Cassiani, M., Morton, D., Seibert, P., Angevine, W., Evan,  
5 S., Dingwell, A., Fast, J. D., Easter, R. C., Pisso, I., Burkhardt, J., and Wotawa, G.: The  
6 Lagrangian particle dispersion model FLEXPART-WRF version 3.1, *Geosci. Model Dev.*, 6,  
7 1889-1904, doi:10.5194/gmd-6-1889-2013, 2013.

8 Bougiatioti, A., Fountoukis, C., Kalivitis, N., Pandis, S. N., Nenes, A. and Mihalopoulos, N.:  
9 Cloud Condensation Nuclei Measurements in the Marine Boundary Layer of the Eastern  
10 Mediterranean: CCN closure and droplet growth kinetics, *Atmos. Chem. Phys.*, 9, 7053-7066,  
11 2009.

12 Bougiatioti, A., Nenes, A., Fountoukis, C., Kalivitis, N., Pandis, S. N., and Mihalopoulos, N.:  
13 Size-resolved CCN distributions and activation kinetics of aged continental and marine aerosol,  
14 *Atmos.Chem.Phys.*, 11, 8791-8808, 2011.

15 Bougiatioti, A., Bezantakos, S., Stavroulas, I., Kokkalis, P., Biskos, G., Mihalopoulos, N.,  
16 Papayannis, A., Nenes, A.: Contribution of biomass burning to CCN number and  
17 hygroscopicity during summertime in the Eastern Mediterranean, *Atmos. Chem. Phys.*, in  
18 review, 2016.

19 Burton, S. P., Ferrare, R. A., Vaughan, M. A., Omar, A. H., Rogers, R. R., Hostetler, C. A., and  
20 Hair, J. W.: Aerosol classification from airborne HSRL and comparisons with the CALIPSO  
21 vertical feature mask, *Atmos. Meas. Tech.*, 6, 1397-1412, doi:10.5194/amt-6-1397-2013, 2013.

22 Chaikovsky, A., Dubovik, O., Holben, B., Bril, A., Goloub, P., Tanré, D., Pappalardo, G.,  
23 Wandinger, U., Chaikovskaya, L., Denisov, S., Grudo, Y., Lopatin, A., Karol, Y., Lapyonok,  
24 T., Amiridis, V., Ansmann, A., Apituley, A., Allados-Arboledas, L., Biniotoglou, I., Boselli,  
25 A., D'Amico, G., Freudenthaler, V., Giles, D., Granados-Muñoz, M. J., Kokkalis, P., Nicolae,  
26 D., Oshchepkov, S., Papayannis, A., Perrone, M. R., Pietruczuk, A., Rocadenbosch, F., Sicard,  
27 M., Slutsker, I., Talianu, C., De Tomasi, F., Tsekeri, A., Wagner, J., and Wang, X.: Lidar-  
28 Radiometer Inversion Code (LIRIC) for the retrieval of vertical aerosol properties from  
29 combined lidar/radiometer data: development and distribution in EARLINET, *Atmos. Meas.*  
30 *Tech. Discuss.*, 8, 12759-12822, doi:10.5194/amtd-8-12759-2015, 2015.

1 Chang, R. Y.-W., Slowik, J. G., Shantz, N. C., Vlasenko, A., Liggio, J., Sjostedt, S. J., Leaitch,  
2 W. R., and Abbatt, J. P. D.: The hygroscopicity parameter ( $\kappa$ ) of ambient organic aerosol at a  
3 field site subject to biogenic and anthropogenic influences: relationship to degree of aerosol  
4 oxidation, *Atmos. Chem. Phys.*, 10, 5047-5064, doi:10.5194/acp-10-5047-2010, 2010.

5 Chazette, P., Bocquet, M., Royer, P., Winiarek, V., Raut, J. -C., Labazuy, P., Gouhier, M.,  
6 Lardier, M. and Cariou, J. -P.: Eyjafjallajökull ash concentrations derived from both lidar and  
7 modeling, *J. Geophys. Res.*, 117, D00U14, doi:10.1029/2011JD015755, 2012.

8 Coleman, T. F. and Li, Y.: On the Convergence of Reflective Newton Methods for Large-Scale  
9 Nonlinear Minimization Subject to Bounds, *Mathematical Programming*, Vol. 67, Number 2,  
10 pp. 189-224, 1994.

11 Coleman, T. F. and Li, Y.: An Interior, Trust Region Approach for Nonlinear Minimization  
12 Subject to Bounds, *SIAM Journal on Optimization*, Vol. 6, pp. 418-445, 1996.

13 Dubovik, O., Holben, B., Eck, T. F., Smirnov, A., Kaufman, Y. J., King, M. D., Tanré, D., and  
14 Slutsker, I.: Variability of Absorption and Optical Properties of Key Aerosol Types Observed  
15 in Worldwide Locations, *J. Atmos. Sci.*, 59, 590-608, doi:10.1175/1520-  
16 0469(2002)059<0590:VOAAOP>2.0.CO;2, 2002

17 Dinar, E., Mentel, T. F., and Rudich, Y.: The density of humic acids and humic like substances  
18 (HULIS) from fresh and aged wood burning and pollution aerosol particles, *Atmos. Chem.*  
19 *Phys.*, 6, 5213-5224, doi:10.5194/acp-6-5213-2006, 2006.

20 Dinar, E., Riziq, A. A., Spindler, C., Erlick, C., Kiss, G., and Rudich, Y.: The complex  
21 refractive index of atmospheric and model humic-like substances (HULIS) retrieved by a cavity  
22 ring down aerosol spectrometer (CRD-AS), *Faraday Discuss.*, 137, 279-295, 2008.

23 Dubovik, O.: Optimization of Numerical Inversion in Photopolarimetric Remote Sensing, in:  
24 Photopolarimetry in Remote Sensing, edited by: Videen, G., Yatskiv, Y., and Mishchenko,  
25 M., Kluwer Academic Publishers, Dordrecht, the Netherlands, 65-106, 2004. Fleming, R. J. and  
26 May, R. D.: The 2nd Generation Water Vapor Sensing System and Benefits of Its Use on  
27 Commercial Air craft for Air Carriers and Society, UCAR, Boulder, CO, available at:  
28 <https://www.eol.ucar.edu/system/files/spectrasensors.pdf> (last access: 16 December 2014),  
29 2004.

1 Engelhart, G. J., Hildebrandt, L., Kostenidou, E., Mihalopoulos, N., Donahue, N. M., and  
2 Pandis, S. N.: Water content of aged aerosol, *Atmos. Chem. Phys.*, 11, 911-920,  
3 doi:10.5194/acp-11-911-2011, 2011.

4 Ervens, B., Turpin, B. J., and Weber, R. J.: Secondary organic aerosol formation in cloud  
5 droplets and aqueous particles (aqSOA): a review of laboratory, field and model studies, *Atmos.*  
6 *Chem. Phys. Discuss.*, 11, 22301–22383, doi:10.5194/acpd-11-22301-2011, 2011

7 Fountoukis, C., Nenes, A., Sullivan, A., Weber, R., VanReken, T., Fischer, M., Matias, E.,  
8 Moya, M. Farmer, D., and Cohen, R.: Thermodynamic characterization of Mexico City Aerosol  
9 during MILAGRO 2006, *Atmos. Chem. Phys.*, 9, 2141-2156, 2009.

10 Fountoukis, C. and Nenes, A.: ISORROPIA II: a computationally efficient thermodynamic  
11 equilibrium model for  $K^+Ca^{2+}Mg^{2+}NH_4^+Na^+SO_4^{2-}NO_3^-Cl^-H_2O$  aerosols, *Atmos.*  
12 *Chem. Phys.*, 7, 4639-4659, 2007.

13 Gasteiger, J., Wiegner, M., Groß, S., Freudenthaler, V., Toledano, C., Tesche, M., and Kandler,  
14 K.: Modelling lidar-relevant optical properties of complex mineral dust aerosols, *Tellus B*, 63,  
15 725–741, doi:10.1111/j.1600-0889.2011.00559.x,2011.

16 Gerbig, C., Schmitgen, S., Kley, D., and Volz-Thomas, A.: An improved fast-response vacuum  
17 UV resonance fluorescence CO instrument, *J. Geophys. Res.*, 104, 1699–1704, 1999.

18 Guo, H., Xu, L., Bougiatioti, A., Cerully, K. M., Capps, S. L., Hite Jr., J. R., Carlton, A. G.,  
19 Lee, S.-H., Bergin, M. H., Ng, N. L., Nenes, A., and Weber, R. J.: Fine-particle water and pH  
20 in the Southeastern United States, *Atmos. Chem. Phys.*, 15, 5211-5228, doi:10.5194/acp-15-  
21 5211-2015, 2015.

22 Guo, H., Sullivan, A.P., Campuzano-Jost, P., Schroder, J.C., Lopez-Hilfiger, F.D., Dibb, J.E.,  
23 Jimenez, J.L., Thornton, J.A, Brown, S.S., Nenes, A., and Weber, R.J.: Fine particle pH and the  
24 partitioning of nitric acid during winter in the northeastern United States, *J.Geoph.Res.*, in  
25 press, 2016.

26 Haywood, J., Francis, P., Dubovik, O., Glew, M., Holben, B.: Comparison of aerosol size  
27 distributions, radiative properties, and optical depths determined by aircraft observations and  
28 Sun photometers during SAFARI 2000, *J.Geophys. Res.*108 (D13), 8471,  
29 <http://dx.doi.org/10.1029/2002JD002250>, 2003.

1 Hegg, D. A., Livingston, J., Hobbs, P. V., Novakov, T., Russell, P.: Chemical apportionment  
2 of aerosol column optical depth off the mid-Atlantic coast of the United States, *Journal of*  
3 *Geophysical Research: Atmospheres*, 102.D21 (1997): 25293-25303, 1997.

4 Heim M., Mullins J. M., Umhauer H., Kasper G.: Performance evaluation of three optical  
5 particle counters with an efficient “multimodal” calibration method, *Journal of Aerosol*  
6 *Science*, 39, 1019–1031, 2008.

7 Hennigan, C. J., Izumi, J., Sullivan, A. P., Weber, R. J. and Nenes, A.: A Critical Evaluation of  
8 Proxy Methods used to Estimate the Acidity of Atmospheric Particles, *Atmos. Chem. Phys.*,  
9 15, 2775-2790, 2015.

10 Highwood, E. J., Northway, M. J., McMeeking, G. R., Morgan, W. T., Liu, D., Osborne, S.,  
11 Bower, K., Coe, H., Ryder, C., and Williams, P.: Aerosol scattering and absorption during the  
12 EUCAARI-LONGREX flights of the Facility for Airborne Atmospheric Measurements  
13 (FAAM) BAe-146: can measurements and models agree?, *Atmos. Chem. Phys.*, 12, 7251-7267,  
14 doi:10.5194/acp-12-7251-2012, 2012.

15 Holben, B. N., Eck, T. F., Slutsker, I., Tanré, D., Buis, J. P., Setzer, A., Vermote, E., Reagan,  
16 J. A., Kaufman, Y. J., Nakajima, T., Lavenu, F., Jankowiak, I., and Smirnov, A.: AERONET –  
17 A federated instrument network and data archive for aerosol characterization. *Remote Sens.*  
18 *Environ.* 66, 1-16, 1998.

19 IPCC: Climate Change 2013: The Physical Science Basis. Contribution of Working Group I to  
20 the Fifth Assessment Report of the Intergovernmental Panel on Climate Change, Cambridge  
21 University Press, Cambridge, United Kingdom and New York, NY, USA, 1535 pp., 2013.

22 Johnson, B. T., Haywood, J. M., Langridge, J. M., Darbyshire, E., Morgan, W. T., Szpek, K.,  
23 Brooke, J., Marengo, F., Coe, H., Artaxo, P., Longo, K. M., Mulcahy, J., Mann, G., Dalvi, M.,  
24 and Bellouin, N.: Evaluation of biomass burning aerosols in the HadGEM3 climate model with  
25 observations from SAMBBA, in preparation for *Atmos. Chem. Phys.*, 2016.

26 Kalkavouras P., Bossioli E., Bezantakos S., Bougiatioti A., Kalivitis N., Stavroulas I.,  
27 Kouvarakis G., Protonotariou A. P., Dandou A., Biskos G., Mihalopoulos N., Nenes A.,  
28 Tombrou M.: New Particle Formation in the South Aegean Sea during the Etesians: importance  
29 for CCN production and cloud droplet number, *Atmos. Chem. Phys. Discuss.*, doi:10.5194/acp-  
30 2016-330, in review, 2016.



1 Kanitz, T., Ansmann, A., Foth, A., Seifert, P., Wandinger, U., Engelmann, R., Baars, H.,  
2 Althausen, D., Casiccia, C., and Zamorano, F.: Surface matters: limitations of CALIPSO V3  
3 aerosol typing in coastal regions, *Atmos. Meas. Tech.*, 7, 2061-2072, doi:10.5194/amt-7-2061-  
4 2014, 2014.

5 Klett, D.: Lidar inversion with variable backscatter/extinction ratios, *Appl. Optics*, 31, 1638–  
6 1643, 1985.

7 Le Breton, M., Bacak, A., Muller, J. B. A., O'Shea, S. J., Xiao, P., Ashfold, M. N. R., Cooke,  
8 M. C., Batt, R., Shallcross, D. E., Oram, D. E., Forster, G., Bauguitte, S. J. -B., Palmer, P. I.,  
9 Parrington, M., Lewis, A. C., Lee, J. D., and Percival, C. J.: Airborne hydrogen light blueide  
10 measurements using a chemical ionisation mass spectrometer for the plume identification of  
11 biomass burning forest fires, *Atmos. Chem. Phys.*, 13, 9217-9232, doi:10.5194/acp-13-9217-  
12 2013, 2013.

13 Lelieveld, J., Berresheim, H., Borrmann, S., Crutzen, P. J., Dentener, F. J., Fischer, H., Feichter,  
14 J., Flatau, P. J., Heland, J., Holzinger, R., Korrman, R., Lawrence, M. G., Levin, Z.,  
15 Markowicz, K. M., Mihalopoulos, N., Minikin, A., Ramanathan, V., de Reus, M., Roelofs, G.  
16 J., Scheeren, H. A., Sciare, J., Schlager, H., Schultz, M., Siegmund, P., Steil, B., Stephanou, I.,  
17 E. G., Stier, P., Traub, M., Warneke, C., Williams, J., Ziereis, H.: Global Air Pollution  
18 Crossroads over the Mediterranean, *Science*, 298, 794-799, 2002.

19 Liao, H., and Seinfeld J. H.: Global impacts of gas-phase chemistry-aerosol interactions on  
20 direct radiative forcing by anthropogenic aerosols and ozone, *J. Geophys. Res.*, 110, D18208,  
21 doi:10.1029/2005JD005907, 2005.

22 Lobert, J. M., Scharffe, D. H., Hao, W. M., and Crutzen, P. J.: Importance of biomass burning  
23 in the atmospheric budgets of nitrogen containing gases, *Nature*, 346, 552–554, 1990.

24 Lopatin, A., Dubovik, O., Chaikovsky, A., Goloub, P., Lapyonok, T., Tanré, D., and Litvinov,  
25 P.: Enhancement of aerosol characterization using synergy of lidar and sun-photometer  
26 coincident observations: the GARRLiC algorithm, *Atmos. Meas. Tech.*, 6, 2065-2088,  
27 doi:10.5194/amt-6-2065-2013, 2013.

28 Lowe, P. R. and Ficke, J. M.: The computation of saturation vapor pressure. Tech. Paper No.  
29 4-74, Environmental Prediction Research Facility, Naval Postgraduate School, Monterey, CA,  
30 27 pp, 1974.

1 Malm, K. C., and Day, D. E.: Estimates of aerosol species scattering characteristics as a function  
2 of relative humidity. *Atmos. Environ.*, 35, 2845-2860, 2001.

3 Marengo, F., Johnson, B., Turnbull, K., Newman, S., Haywood, J., Webster, H., and Ricketts,  
4 H.: Airborne Lidar Observations of the 2010 Eyjafjallajökull Volcanic Ash Plume, *J. Geophys.*  
5 *Res.*, 116, D00U05, doi:10.1029/2011JD016396, 2011.

6 McConnell, C. L., Formenti, P., Highwood, E. J., and Harrison, M. A. J.: Using aircraft  
7 measurements to determine the refractive index of Saharan dust during the DODO Experiments,  
8 *Atmos. Chem. Phys.*, 10, 3081–3098, doi:10.5194/acp-10-3081-2010, 2010.

9 Mishchenko, M.I., and Travis, L.D.: Satellite retrieval of aerosol properties over the ocean using  
10 polarization as well as intensity of reflected sunlight, *J. Geophys. Res.*, 102, 16989-17013,  
11 1997.

12 Mikhailov, E., Vlasenko, S., Rose, D., and Pöschl, U.: Mass-based hygroscopicity parameter  
13 interaction model and measurement of atmospheric aerosol water uptake, *Atmos. Chem. Phys.*,  
14 13, 717-740, doi:10.5194/acp-13-717-2013, 2013.

15 Morgan, W. T., Allan, J. D., Bower, K. N., Highwood, E. J., Liu, D., McMeeking, G. R.,  
16 Northway, M. J., Williams, P. I., Krejci, R., and Coe, H.: Airborne measurements of the spatial  
17 distribution of aerosol chemical composition across Europe and evolution of the organic  
18 fraction, *Atmos. Chem. Phys.*, 10, 4065-4083, DOI 10.5194/acp-10-4065-2010, 2010.

19 Müller, D., Böckmann, C., Kolgotin, A., Schneidenbach, L., Chemyakin, E., Rosemann, J.,  
20 Znak, P., and Romanov, A.: Microphysical particle properties derived from inversion  
21 algorithms developed in the framework of EARLINET, *Atmos. Meas. Tech. Discuss.*, 8, 12823-  
22 12885, doi:10.5194/amtd-8-12823-2015, 2015.

23 Omar, A. H., Won, J. -G., Winker, D. M., Yoon, S. -C., Dubovik, O., and McCormick, M. P.:  
24 Development of global aerosol models using cluster analysis of Aerosol Robotic Network  
25 (AERONET) measurements, *J. Geophys. Res.*, 110, D10S14, doi:10.1029/2004JD004874,  
26 2005.

27 Omar, A. H., Winker, D. M., Vaughan, M. A., Hu, Y., Trepte, C. R., Ferrare, R. A., Lee, K. -  
28 P., Hostetler, C. A., Kittaka, C., Rogers, R. R., Kuehn, R. E. and Liu, Z.: The CALIPSO  
29 Automated Aerosol Classification and Lidar Ratio Selection Algorithm, *J. Atmos. Oceanic*  
30 *Technol.*, 26, 1994–2014 doi: <http://dx.doi.org/10.1175/2009JTECHA1231.1>, 2009.

- 1 Ogren, J. A.: Comment on “Calibration and Intercomparison of Filter-Based Measurements of  
2 Visible Light Absorption by Aerosols”, *Aerosol Sci. Technol.*, 44, 589–591,  
3 doi:10.1080/02786826.2010.482111, 2010.
- 4 Pappalardo, G., Amodeo, A., Apituley, A., Comeron, A., Freudenthaler, V., Linné, H.,  
5 Ansmann, A., Bösenberg, J., D'Amico, G., Mattis, I., Mona, L., Wandinger, U., Amiridis, V.,  
6 Alados-Arboledas, L., Nicolae, D., and Wiegner, M.: EARLINET: towards an advanced  
7 sustainable European aerosol lidar network, *Atmos. Meas. Tech. Discuss.*, 7, 2929-2980,  
8 doi:10.5194/amtd-7-2929-2014, 2014.
- 9 Petters, M. D. and Kreidenweis, S. M.: A single parameter representation of hygroscopic  
10 growth and cloud condensation nucleus activity, *Atmos. Chem. Phys.*, 7, 1961-1971,  
11 doi:10.5194/acp-7-1961-2007, 2007.
- 12 Pikridas, M., Riipinen, I., Hildebrandt, L., Kostenidou E., Manninen, H., Mihalopoulos, N.,  
13 Kalivitis, N., Burkhardt J. F., Stohl, A., Kulmala, M., Pandis S. N.: New particle formation at a  
14 remote site in the eastern Mediterranean, *J. Geophys. Res.*, 117, D12205,  
15 doi:10.1029/2012JD017570, 2012.
- 16 Quinn, P. K., Bates, T. S., Baynard, T., Clarke, A. D., Onasch, T. B., Wang, W., Rood, M. J.,  
17 Andrews, E., Allan, J., Carrico, C. M., Coffman, D., and Worsnop, D.: Impact of particulate  
18 organic matter on the relative humidity dependence of light scattering: A simplified  
19 parameterization, *Geophys. Res. Lett.*, 32, L22809, doi: 10.1029/2005GL024322, 2005.
- 20 Pilinis, C., Pandis, S. N., and Seinfeld J. H.: Sensitivity of direct climate forcing by atmospheric  
21 aerosols to aerosol size and composition, *J. Geophys. Res.*, 100(D9), 18739–18754,  
22 doi:10.1029/95JD02119, 1995.
- 23 Rodgers, C.: *Inverse Methods for Atmospheric Sounding: Theory and Practice*, World  
24 Scientific, Singapore, 2000.
- 25 Rosenberg, P. D., Dean, A. R., Williams, P. I., Dorsey, J. R., Minikin, A., Pickering, M. A.,  
26 and Petzold, A.: Particle sizing calibration with refractive index correction for light scattering  
27 optical particle counters and impacts upon PCASP and CDP data collected during the Fennec  
28 campaign, *Atmos. Meas. Tech.*, 5, 1147-1163, doi:10.5194/amt-5-1147-2012, 2012.

1 Ryder, C. L., Highwood, E. J., Rosenberg, P. D., Trembath, J., Brooke, J. K., Bart, M., Dean,  
2 A., Crosier, J., Dorsey, J., Brindley, H., Banks, J., Marsham, J. H., McQuaid, J. B., Sodemann,  
3 H., and Washington, R.: Optical properties of Saharan dust aerosol and contribution from the  
4 coarse mode as measured during the Fennec 2011 aircraft campaign, *Atmospheric Chemistry  
5 and Physics*, 13 (1), 303 – 325, ISSN 1680-7316, 2013.

6 Seinfeld, J. H. and Pandis, S. N.: *Atmospheric Chemistry and Physics: from Air Pollution to  
7 Climate Change 2nd Edn.*, John Wiley & Sons, Inc., Hoboken, New Jersey, 2006.

8 Skamarock, W., Klemp, J. B., Dudhia, J., Gill, D. O., Barker, D., Duda, M. G., Huang, X. -Y.,  
9 and Wang., W.: A description of the Advanced Research WRF version 3, NCAR Technical  
10 Note NCAR/TN-475+STR, DOI: 10.5065/D68S4MVH, 2008. Snider, J. R. and Petters, M. D.:  
11 Optical particle counter measurement of marine aerosol hygroscopic growth, *Atmos. Chem.  
12 Phys.*, 8, 1949-1962, doi:10.5194/acp-8-1949-2008, 2008.

13 Strapp, J. W., Leitch, W. R., Liu P. S. K.: Hydrated and dried aerosol-size distribution  
14 measurements from the particle measuring systems FSSP-300 probe and the deiced PSASP-  
15 100X probe. *J. Atmos. Oceanic Technol.*, 9, 548 – 555, 1992.

16 Strapp, J., Leitch, W., Liu, P.: Hydrated and dried aerosol-size distribution measurements  
17 from the particle measuring systems FSSP-300 probe and the deiced PSASP-100X probe, *J.  
18 Atmos. Oceanic Technol.*, 9, 548 – 555, 1992. Tang, I. N. and Munkelwitz, H. R.: Chemical and  
19 size effects of hygroscopic aerosols on light scattering coefficients, *J. Geophys. Res.*, 101,  
20 19,245-19,250, 1996.

21 Tombrou, M., Bossioli, E., Kalogiros, J., Allan, J.D., Bacak, A., Biskos, G., Coe, H., Dandou,  
22 A., Kouvarakis, G., Mihalopoulos, N., Percival, C.J., Protonotariou, A.P., and Szabó-Takács,  
23 B.: Physical and chemical processes of air masses in the Aegean Sea during Etesians: Aegean-  
24 GAME airborne campaign, *Science of The Total Environment*, 506–507, 201-216,  
25 doi:10.1016/j.scitotenv.2014.10.098, 2015.

26 Toon, O. B., Pollack, J. B., and Khare, B. N.: The optical constants of several atmospheric  
27 aerosol species: ammonium sulphate, aluminium oxide and sodium chloride, *J. Geophys. Res.*,  
28 81, 5733–5748, 1976.

29 Trembath, J., Bart, M., and Brooke, J.: FAAM Technical Note: Efficiencies of modified  
30 Rosemount housings for sampling aerosol on a fast atmospheric research aircraft, Facility for  
31 Airborne Atmospheric Measurements, FAAM, Cranfield, UK,

1 <http://www.faam.ac.uk/index.php/component/docman/catview/140-science-instruments> (last  
2 access: 7 January 2013), 2012.

3 Turnbull, K.: PSAP Corrections, Met Office, OBR, UK Met Office, Exeter, UK, Technical  
4 Note No. 80, [http://www.faam.ac.uk/index.php/component/docman/catview/140-science-](http://www.faam.ac.uk/index.php/component/docman/catview/140-science-instruments)  
5 [instruments](http://www.faam.ac.uk/index.php/component/docman/catview/140-science-instruments) (last access: 7 January 2013), 2010.

6 Vance, A. K., Abel, S. J., Cotton, R. J., and Woolley, A. M.: Performance of WVSS-II  
7 hygrometers on the FAAM research aircraft, *Atmos. Meas. Tech.*, 8, 1617-1625,  
8 doi:10.5194/amt-8-1617-2015, 2015.

9 Vaughan, M., Young, S., Winker, D., Powell, K., Omar, A., Liu, Z., Hu, Y., and Hostetler, C.:  
10 Fully automated analysis of space-based lidar data: An overview of the CALIPSO retrieval  
11 algorithms and data products, *Proc. SPIE*, 5575, 16–30, 2004.

12 Weast, R. C. (Ed): *CRC Handbook of Chemistry and Physics* (67<sup>th</sup> edition), CRC press, Boca  
13 Raton, Florida, 1985.

14 Weber, R.J., Guo, H., Russell, A.G., Nenes, A.: High aerosol acidity despite declining  
15 atmospheric sulfate concentrations over the past 15 years, *Nature Geosci.*,  
16 doi:10.1038/ngeo2665, 2016.

17 Weinzierl, B., Petzold, A., Esselborn, M., Wirth, M., Rasp, K., Kandler, K., Schutz, L., Koepke,  
18 P. and Fiebig, M.: Airborne measurements of dust layer properties, particle size distribution  
19 and mixing state of Saharan dust during SAMUM 2006, *Tellus B*, 61: 96–117, doi:  
20 10.1111/j.1600-0889.2008.00392.x, 2009.

21 Winker, D. M., Vaughan, M. A., Omar, A., Hu, Y., Powell, K. A., Liu, Z., Hunt, W. H., and  
22 Young, S. A.: Overview of the CALIPSO Mission and CALIOP Data Processing Algorithms,  
23 *J. Atmos. Oceanic Technol.*, 26, 2310–2323, doi:  
24 <http://dx.doi.org/10.1175/2009JTECHA1281.1>, 2009.

25 Young, S. A. and Vaughan, M. A.: The retrieval of profiles of particulate extinction from  
26 Cloud-Aerosol Lidar Infrared Pathfinder Satellite Observations (CALIPSO) data: Algorithm  
27 description, *J. Atmos. Ocean. Tech.*, 26, 1105–1119, 2009.

28 Yuan, Y.X.: Recent advance in trust region algorithms, *Mathematical Programming Series B*,  
29 151, 249–281, 2015.

1 Ziamba, L. D., Thornhill, L., Ferrare, R., Barrick, J., Beyersdorf, A., Chen, G., Crumeyrolle,  
2 S., Hair, J. W., Hostetler, C., Hudgins, C., Obland, M., Rogers, R. R., Scarino, A. J., Winstead,  
3 E. L., and Anderson B. E.: Airborne observations of aerosol extinction by in situ and remote-  
4 sensing techniques: Evaluation of particle hygroscopicity, *Geophys. Res. Lett.*, 40, 417-422,  
5 doi:10.1029/2012GL054428, 2013.

1 Table 1. The in-situ instruments and data acquired from the FAAM BAe-146 research aircraft  
 2 during the ACEMED campaign.

| <b>Property measured</b>                                        | <b>Instrument</b>                                            | <b>Important information about the data</b>                  |
|-----------------------------------------------------------------|--------------------------------------------------------------|--------------------------------------------------------------|
| Dry aerosol number size distribution                            | Passive cavity aerosol spectrometer probe 100-X (PCASP)      | Nominal size range: 0.05 - 1.5 $\mu\text{m}$ (radius)        |
|                                                                 | 1.129 GRIMM Technik Sky-Optical Particle Counter (GRIMM)     | Nominal size range: 0.125 – 16 $\mu\text{m}$ (radius)        |
| Dry aerosol chemical composition and mass                       | Aerodyne time-of-flight aerosol mass spectrometer (AMS)      | Nominal size range: 0.025 - 0.4 $\mu\text{m}$ (radius)       |
| Dry aerosol light scattering coefficient at 450, 550 and 700 nm | TSI Integrating Nephelometer 3563 (Nephelometer)             | We consider a sampling cut-off at 1.5 $\mu\text{m}$ (radius) |
| Dry aerosol light absorption coefficient at 567 nm              | Radiance Research Particle Soot Absorption Photometer (PSAP) | We consider a sampling cut-off at 1.5 $\mu\text{m}$ (radius) |
| HCN                                                             | Chemical Ionization Mass Spectrometer (CIMS)                 | -                                                            |
| CO                                                              | Fast fluorescence CO analyser                                | -                                                            |
| Water vapor volume mixing ratio                                 | Water Vapor Sensing System version two (WVSS-II)             | -                                                            |
| Air temperature                                                 | Rosemount deiced temperature sensor                          | -                                                            |
| Static air pressure                                             | Reduced Vertical Separation Minimum system                   | -                                                            |

3

1 Table 2. Refractive indices and densities used for the refractive index calculation from AMS  
 2 data acquired from the FAAM BAe-146 research aircraft during the ACEMED campaign.

| <b>Chemical species</b>                                      | <b>Refractive index<br/>at 550 nm</b> | <b>Density (<math>g\ cm^{-3}</math>)</b> | <b>References</b>                          |
|--------------------------------------------------------------|---------------------------------------|------------------------------------------|--------------------------------------------|
| Ammonium Sulphate<br>( $NH_4$ ) <sub>2</sub> SO <sub>4</sub> | 1.53-0i                               | 1.77                                     | Toon (1976)                                |
| Ammonium Nitrate<br>NH <sub>4</sub> NO <sub>3</sub>          | 1.611-0i                              | 1.8                                      | Weast (1985)                               |
| Organic carbon of<br>the Swanee River<br>Fulvic Acid         | 1.538-0.02i                           | 1.5                                      | Dinar et al. (2006)<br>Dinar et al. (2008) |

3



1 Table 3. Retrieved number size distribution parameters of dry and ambient particles, for the  
 2 retrieval above land. The total number concentration and geometric standard deviation is the  
 3 same for dry and ambient particles.

| Height (km) | Dry particles                                                    |                                                           |                                                             | Ambient particles                                                |                                                           |                                                             |
|-------------|------------------------------------------------------------------|-----------------------------------------------------------|-------------------------------------------------------------|------------------------------------------------------------------|-----------------------------------------------------------|-------------------------------------------------------------|
|             | Total number concentrations<br>$N_{fd}, N_{cd}$<br>( $cm^{-3}$ ) | Geometric mean radii<br>$r_{mfd}, r_{mcd}$<br>( $\mu m$ ) | Geometric standard deviations<br>$\sigma_{fd}, \sigma_{cd}$ | Total number concentrations<br>$N_{fa}, N_{ca}$<br>( $cm^{-3}$ ) | Geometric mean radii<br>$r_{mfa}, r_{mca}$<br>( $\mu m$ ) | Geometric standard deviations<br>$\sigma_{fa}, \sigma_{ca}$ |
| 3.2         | 778, 0.7                                                         | 0.1, 0.7                                                  | 1.5, 1.6                                                    | 778, 0.7                                                         | 0.2, 1.1                                                  | 1.5, 1.6                                                    |
| 2.7         | 1317, 0.9                                                        | 0.1, 0.5                                                  | 1.5, 1.9                                                    | 1317, 0.9                                                        | 0.1, 0.7                                                  | 1.5, 1.9                                                    |
| 1.8         | 726, 0.8                                                         | 0.1, 0.4                                                  | 1.4, 1.9                                                    | 726, 0.8                                                         | 0.1, 0.5                                                  | 1.4, 1.9                                                    |

4

1 Table 4. Retrieved refractive indices of dry and ambient particles, for the retrieval above land.

| Height (km) | Retrieved refractive index |                   |
|-------------|----------------------------|-------------------|
|             | Dry particles              | Ambient particles |
| 3.2         | 1.54+i0.008                | 1.38+ i0.002      |
| 2.7         | 1.60+i0.018                | 1.46+ i0.008      |
| 1.8         | 1.58+i0.021                | 1.55+i0.019       |

2

1 Table 5. Same as Table 3, for the retrieval above ocean.

| Height (km) | Dry particles                                                    |                                                           |                                                             | Ambient particles                                                |                                                           |                                                             |
|-------------|------------------------------------------------------------------|-----------------------------------------------------------|-------------------------------------------------------------|------------------------------------------------------------------|-----------------------------------------------------------|-------------------------------------------------------------|
|             | Total number concentrations<br>$N_{fd}, N_{cd}$<br>( $cm^{-3}$ ) | Geometric mean radii<br>$r_{mfd}, r_{mcd}$<br>( $\mu m$ ) | Geometric standard deviations<br>$\sigma_{fd}, \sigma_{cd}$ | Total number concentrations<br>$N_{fa}, N_{ca}$<br>( $cm^{-3}$ ) | Geometric mean radii<br>$r_{mfa}, r_{mca}$<br>( $\mu m$ ) | Geometric standard deviations<br>$\sigma_{fa}, \sigma_{ca}$ |
| 3.2         | 2814, 0.2                                                        | 0.05, 1.6                                                 | 1.8, 1.4                                                    | 2814, 0.2                                                        | 0.06, 1.9                                                 | 1.8, 1.4                                                    |
| 2.7         | 1500, 0.6                                                        | 0.08, 0.6                                                 | 1.5, 2.4                                                    | 1500, 0.6                                                        | 0.08, 0.6                                                 | 1.5, 2.4                                                    |
| 2.1         | 1833, 0.6                                                        | 0.08, 1.3                                                 | 1.6, 1.8                                                    | 1833, 0.6                                                        | 0.08, 1.4                                                 | 1.6, 1.8                                                    |
| 1.3         | 1427, 0.4                                                        | 0.1, 1.1                                                  | 1.6, 1.6                                                    | 1427, 0.4                                                        | 0.1, 1.1                                                  | 1.6, 1.6                                                    |

2

1 Table 6. Same as Table 4, for the retrieval above ocean.

| Height (km) | Retrieved refractive index |                   |
|-------------|----------------------------|-------------------|
|             | Dry particles              | Ambient particles |
| 3.2         | 1.59+i0.01                 | 1.48+i0.006       |
| 2.7         | 1.66+i0.019                | 1.6+i0.015        |
| 2.1         | 1.59+i0.015                | 1.56+i0.013       |
| 1.3         | 1.50+i0.015                | 1.50+i0.014       |

2

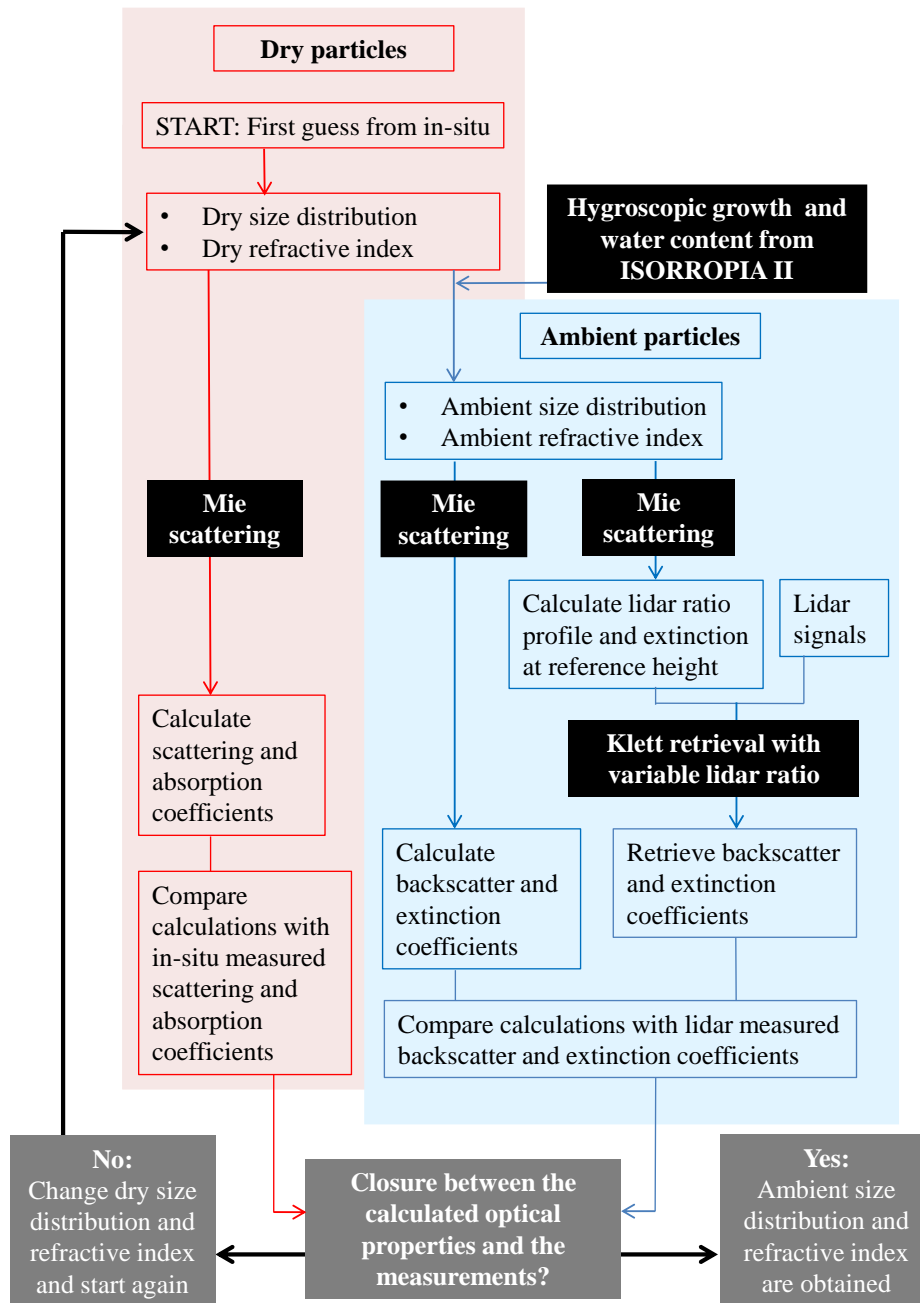

1

2

3 Figure 1. IRRA iterative retrieval scheme used for the estimation of the ambient particle  
 4 microphysical property profiles, based on the airborne in-situ and remote sensing measurements  
 5 available during the ACEMED campaign, and the hygroscopic growth modelling of  
 6 ISORROPIA II.

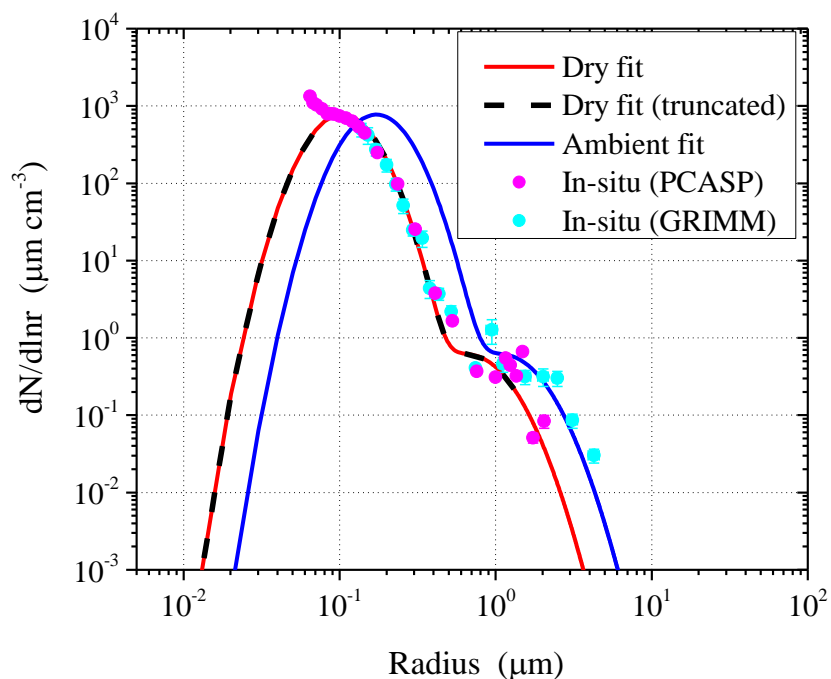

1  
 2  
 3 Figure 2: Number size distributions used for the aerosol optical property calculations. The red  
 4 line denotes the bimodal lognormal fit on the measurements, the black dash line the truncated  
 5 size distribution used to model the dry in-situ measured scattering and absorption coefficients,  
 6 and the blue line the size distribution used to model the ambient backscatter and extinction  
 7 coefficient lidar measurements. The measured in-situ number size distributions are denoted  
 8 with pink and light blue dots, for PCASP and GRIMM OPC data, respectively. The data are  
 9 acquired at 2.7 km above Thessaloniki, on 9 September 2011, at 01:04-01:12 UTC, during the  
 10 ACEMED campaign.

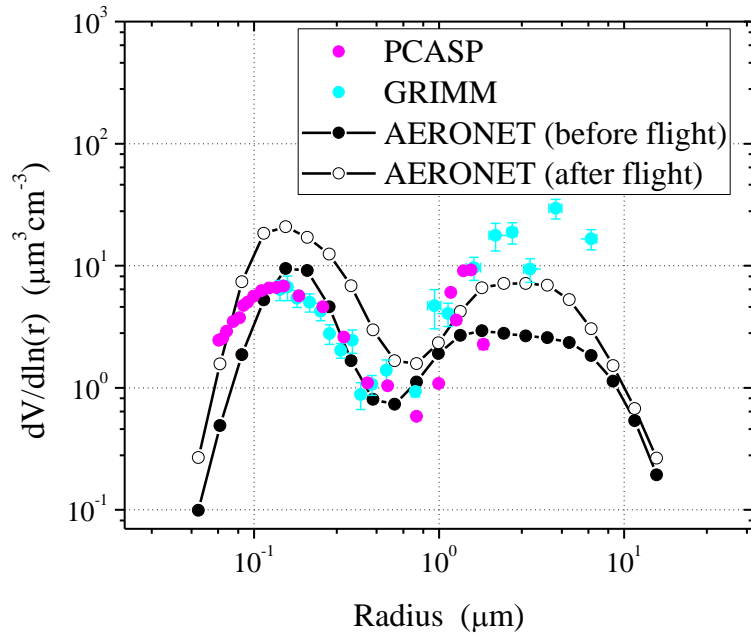

1

2

3 Figure 3. The measured dry volume size distributions from PCASP (pink) and GRIMM (light  
 4 blue), acquired at 2.7 km above Thessaloniki, on 9 September 2011, at 01:04-01:12 UTC. The  
 5 vertical error bars denote the volume uncertainty estimates, and the horizontal error bars the bin  
 6 width uncertainties. The black lines indicate the column ambient size distributions from  
 7 AERONET before (at September 8, 2011, 15:28 UTC, denoted with filled circles) and after the  
 8 flight (at September 9, 2011, 08:25 UTC, denoted with open circles).

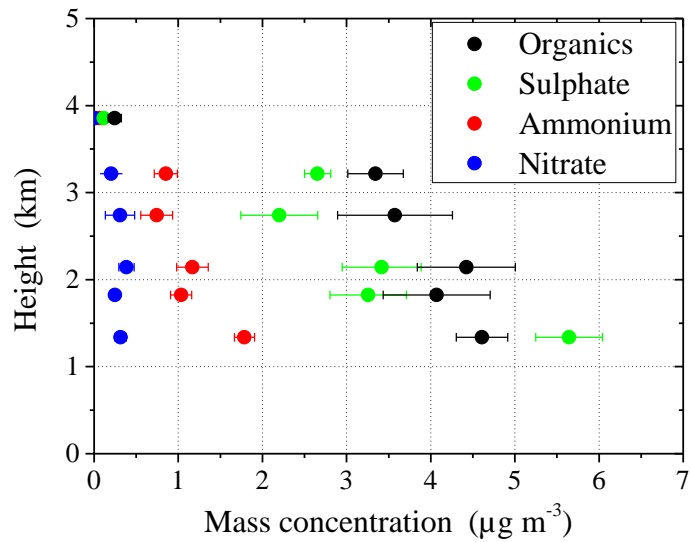

1

2

3 Figure 4. The measured dry mass concentrations from AMS for organics, sulphate, ammonium  
 4 and nitrate, acquired during the ACEMED campaign, above Thessaloniki, on 9 September  
 5 2011, at 00:05-01:45 UTC. The error bars denote the horizontal variability on each SLR.



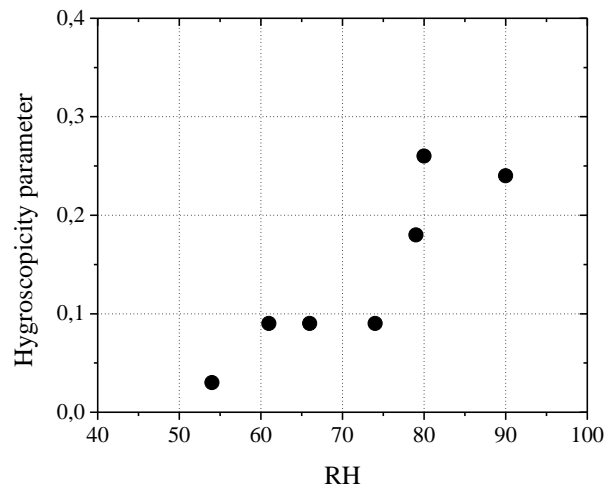

1

2

3 Figure 5. Hygroscopicity parameter calculated with ISORROPIA II for the flight above  
4 Thessaloniki, Greece, on September 9, 2011, during the ACEMED campaign.

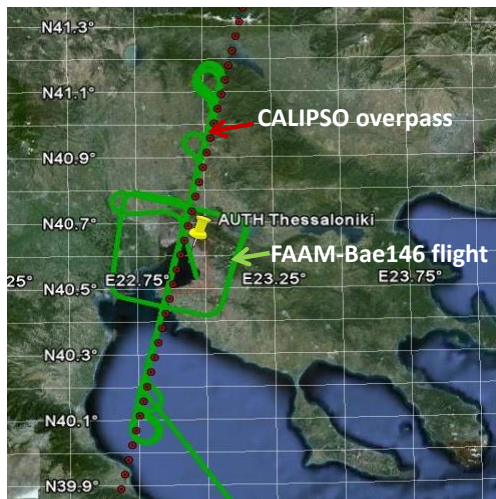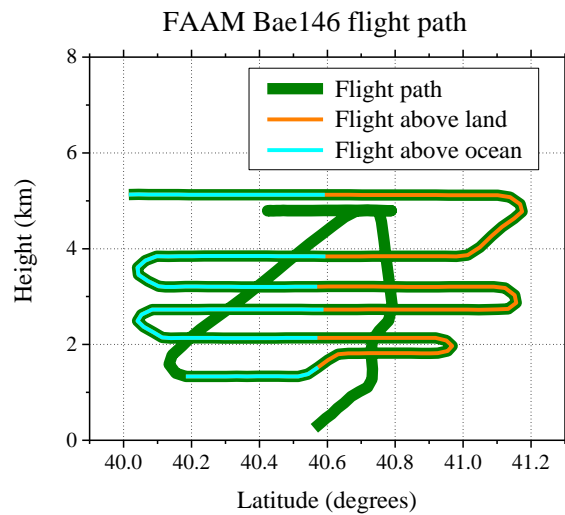

1 a) b)

2

3 Figure 6. a) The FAAM BAe-146 aircraft flight track above Thessaloniki, Greece, on  
 4 September 9, 2011, at 00:05-01:50 UTC (green line) and the CALIPSO track at 00:30 UTC  
 5 (red dots). b) The FAAM BAe-146 flight latitude-altitude profile (green line). The flight  
 6 segments used in the current analysis are denoted with orange colour above land and with light  
 7 blue colour above ocean.

BAe-146 Range Corrected Lidar Signal at 355nm  
2011-09-09, 00:05-00:50 UTC

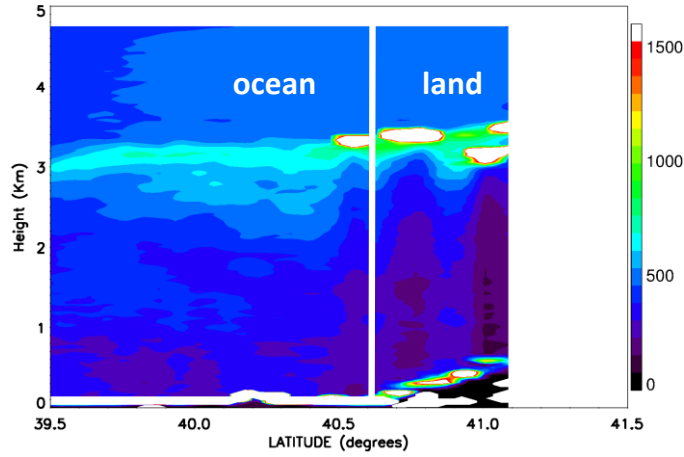

1 a)

CALIPSO Attenuated Bsc Coef. at 532 nm, 2011-09-09, 00:31 UTC

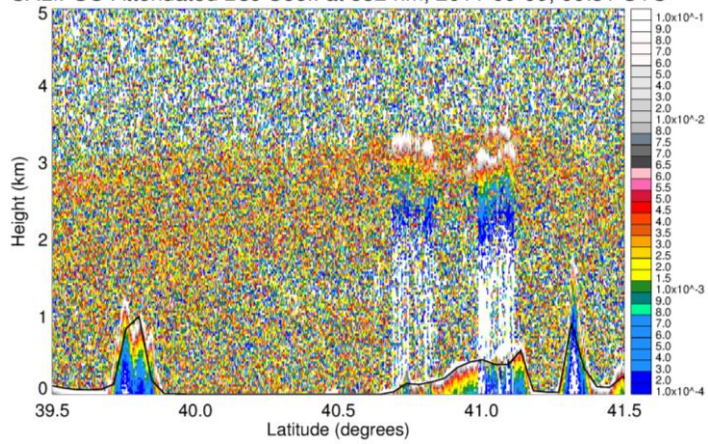

2 b)

CALIPSO Aerosol Subtype (VFM), 2011-09-09, 00:31 UTC

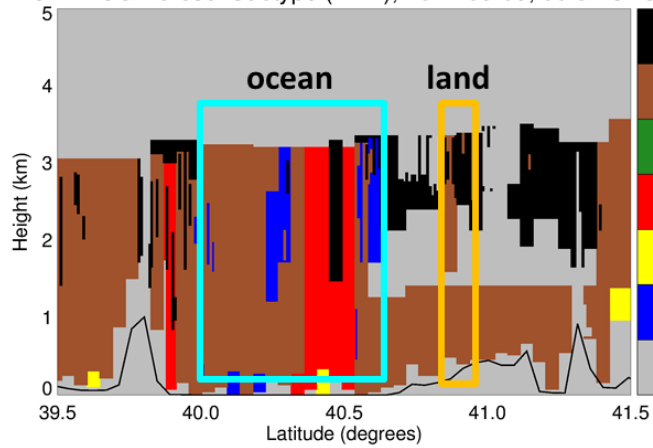

0: Clear Air 1: Clean Marine 2: Dust 3: Polluted Continental  
4: Clean Continental 5: Polluted Dust 6: Smoke

3 c)

4

5 Figure 7. a) The Leosphere ALS450 lidar range-corrected signal at 355 nm, for the FAAM  
6 BAe-146 flight, above Thessaloniki, Greece, on September 9, 2011, at 00:05-00:27 UTC (the

1 white line separates the ocean and land parts, at 40.6 N latitude), b) the CALIPSO attenuated  
2 backscatter coefficient at 532 nm, and c) the CALIPSO aerosol subtypes (VFM), for the  
3 CALIPSO overpass at 00:30 UTC. The light blue and orange rectangles mark the area used to  
4 compare with the FAAM BAe-146 flight measurements above ocean and land, respectively.

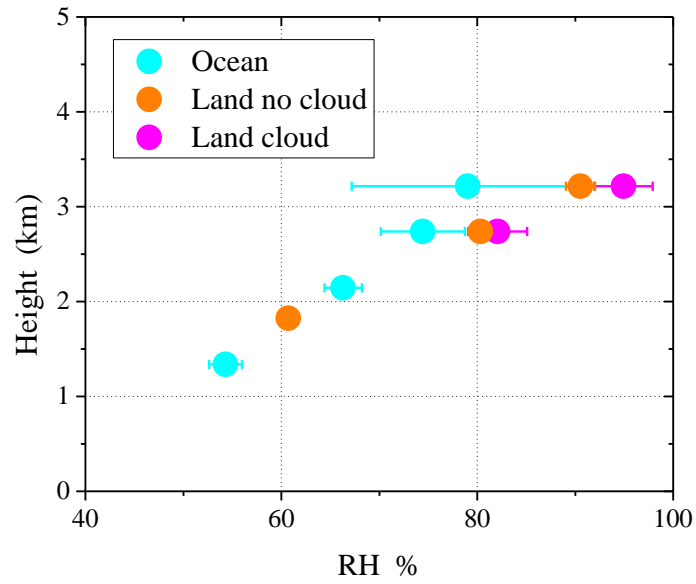

1

2

3 Figure 8. Averaged RH measurements from the WVSS-II instrument, above land (orange  
 4 circles for cloud-free area and pink circles for cloudy area) and ocean (light blue circles), during  
 5 the FAAM BAe-146 aircraft flight above Thessaloniki, Greece, on September 9, 2011, at 00:48-  
 6 01:50 UTC.

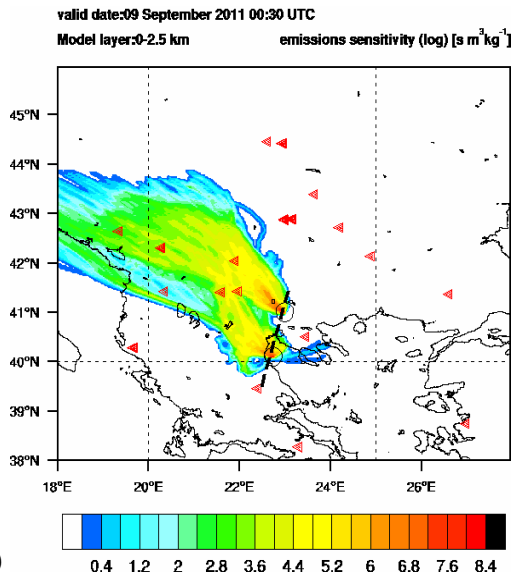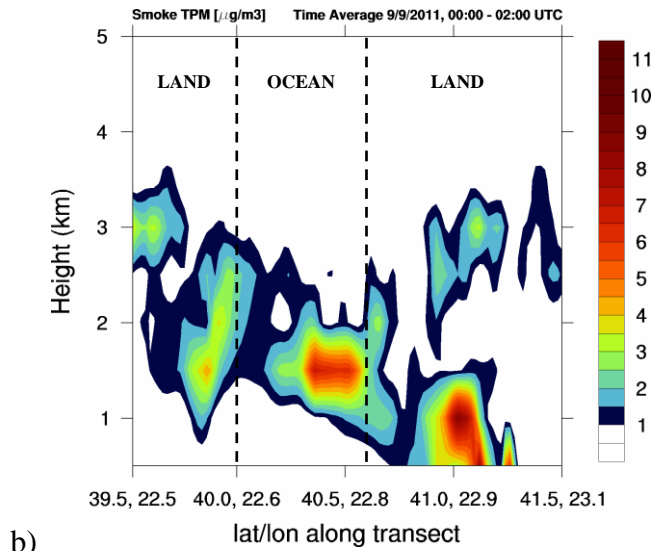

1  
2

3 Figure 9. a) 24-hour emission sensitivity (in logarithmic scale) [ $\text{s m}^3 \text{kg}^{-1}$ ] for particles that  
 4 originate from the first 2.5 km of the FLEXPART-WRF model and are observed on 9  
 5 September 2011, 00:30 UTC at heights between 1-4 km above land and ocean, at Thessaloniki  
 6 area. The red triangles indicate MODIS hot spot locations during that period. b) Cross-section  
 7 of two-hour average concentration of smoke TPM ( $\mu\text{g m}^{-3}$ ) predicted with the dispersion model  
 8 forward simulations along the FAAM-BAe-146 flight, on September 9, 2011, 00:00-02:00  
 9 UTC, indicated with the dashed black line in (a).

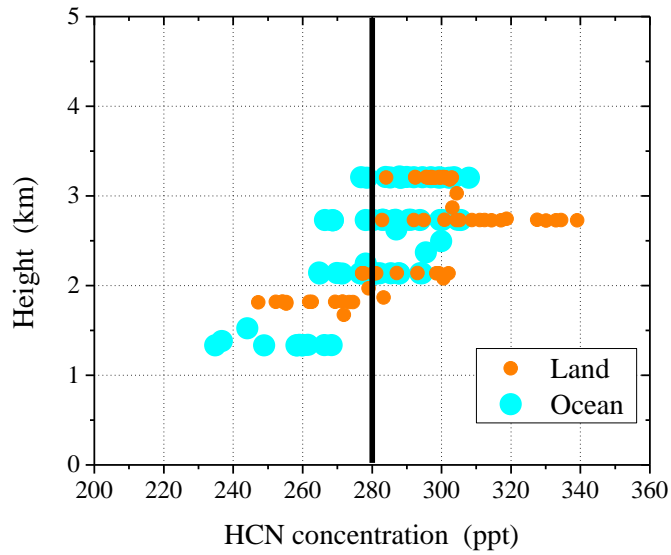

1

2

3 Figure 10. HCN concentration during the FAAM BAe-146 flight above Thessaloniki, Greece,  
 4 on September 9, 2011, at 00:48-01:50 UTC. The data are marked for the flight path above land  
 5 (orange circles) and ocean (light blue circles). The black line at 280 ppt marks the biomass  
 6 burning plume threshold detection, equal to six standard deviations of the median background  
 7 HCN concentration (Le Breton et al., 2013).

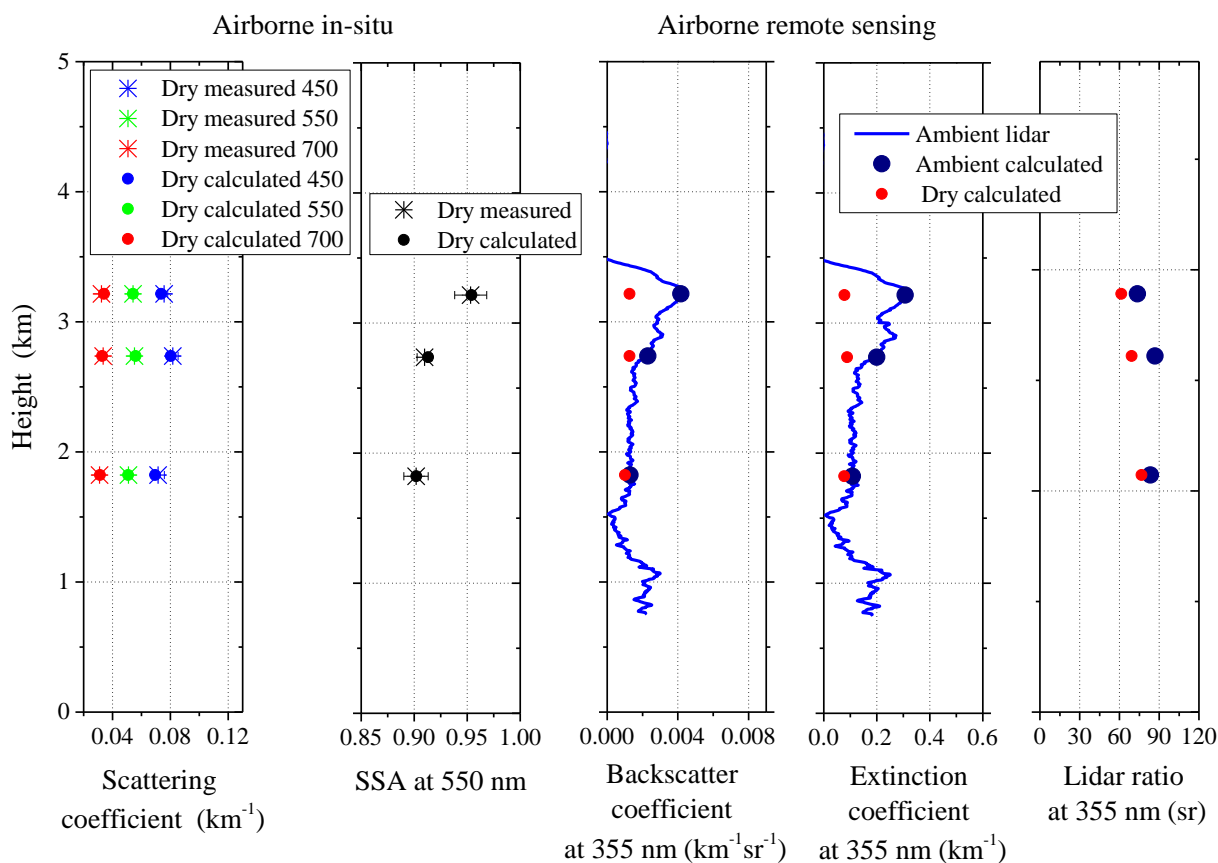

1  
2  
3 Figure 11. Airborne in-situ and remote sensing optical properties, along with the corresponding  
4 calculated optical properties. From left to right: scattering coefficients at 450, 550 and 700 nm  
5 from TSI nephelometer (blue, green and red stars for measurements and dots for calculations),  
6 single scattering albedo (SSA) at 550 nm from PSAP and TSI nephelometer (black stars for  
7 measurements and dots for calculations), backscatter and extinction coefficients at 355 nm (blue  
8 line) retrieved from the lidar measurements, along with the corresponding calculated optical  
9 properties for dry and ambient particles (red and dark blue dots, respectively), and the calculated  
10 lidar ratio at 355 nm for dry and ambient particles. The data refer to the flight segment above  
11 land, above Thessaloniki, Greece, on September 9, 2011, at 00:20-01:42 UTC. The error bars  
12 in the first two plots denote the spatial variability of the measurements during each SLR, rather  
13 than instrumental uncertainty. The calculated optical properties corresponding to the in-situ  
14 measurements are calculated with truncated size distributions at 1.5  $\mu\text{m}$ , whereas for the remote  
15 sensing calculations the size distributions are not truncated.



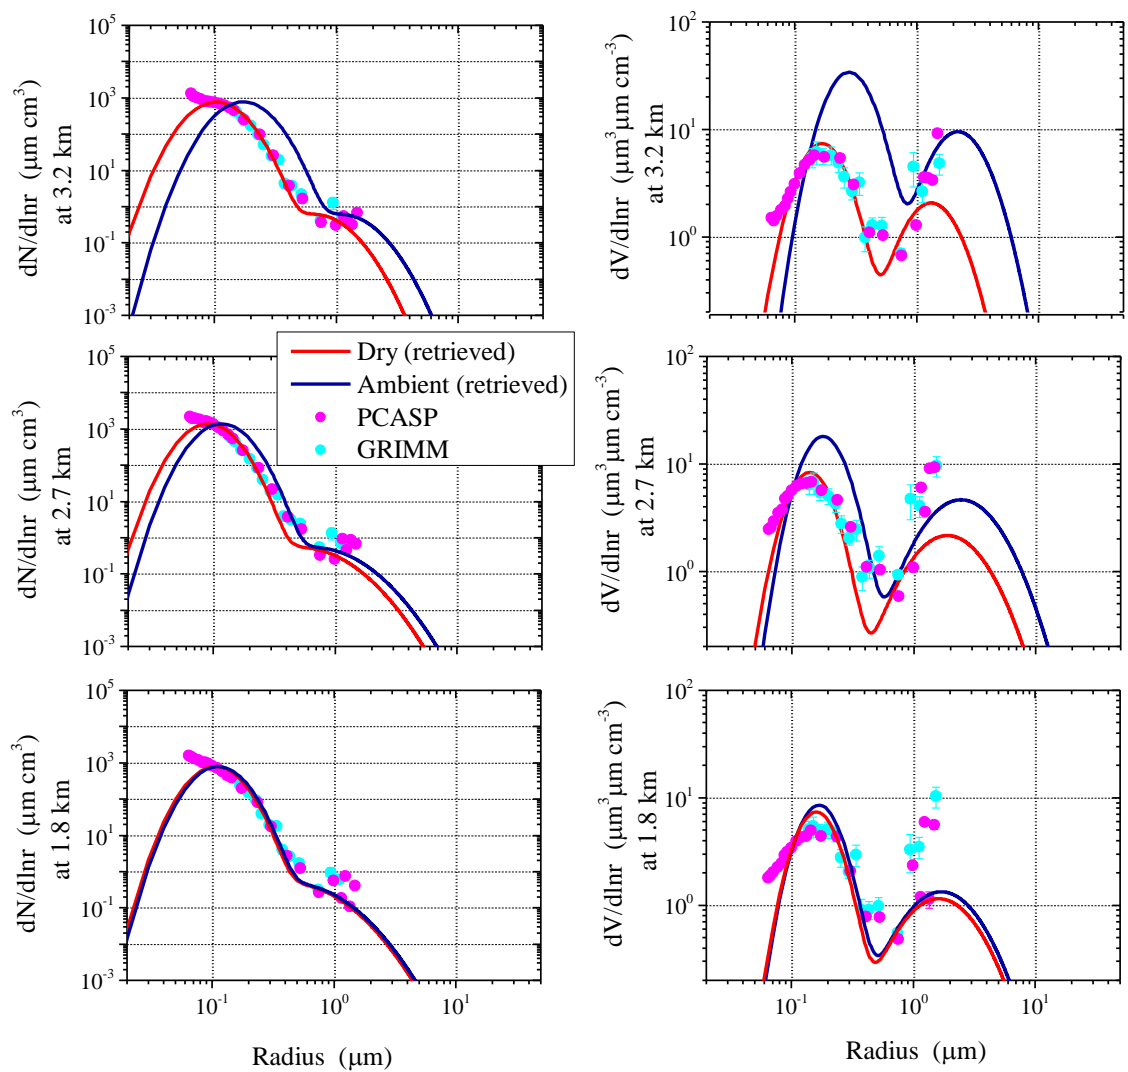

1  
2

3 Figure 12. Retrieved number (left) and volume (right)  
 4 in-situ measurements from PCASP and GRIMM OPCs at the altitudes of 1.8, 2.7 and 3.2 km.  
 5 The red line denotes the dry particles and the blue line the ambient particles. The PCASP and  
 6 GRIMM size distributions are truncated at 1.5  $\mu\text{m}$ , showing the effect of the inlets in the  
 7 sampled volume. The data refer to the flight segment above land, above Thessaloniki, Greece,  
 8 on September 9, 2011, at 00:56-01:42 UTC.

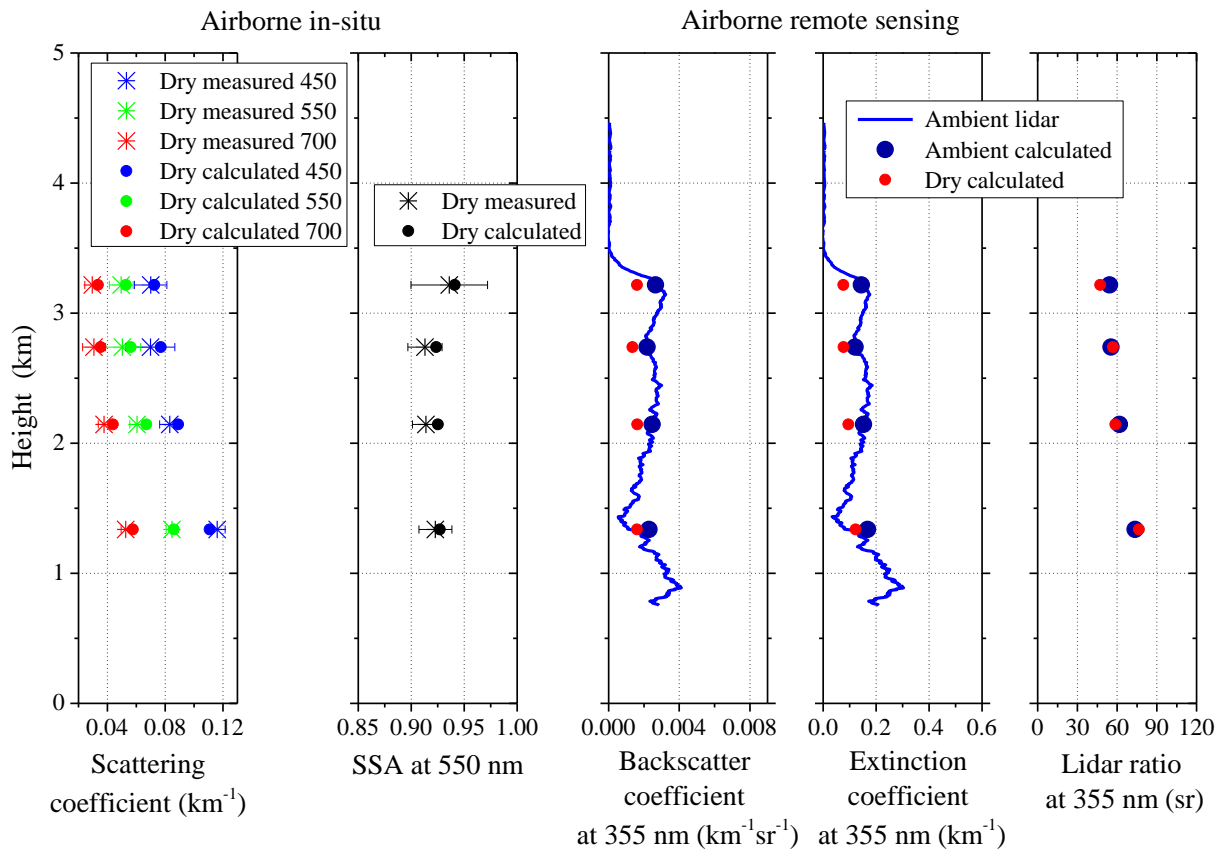

1

2

3 Figure 13. As for Fig. 11, for the flight segment above ocean, above Thessaloniki, on September  
 4 9, 2011, at 00:06-01:50 UTC.

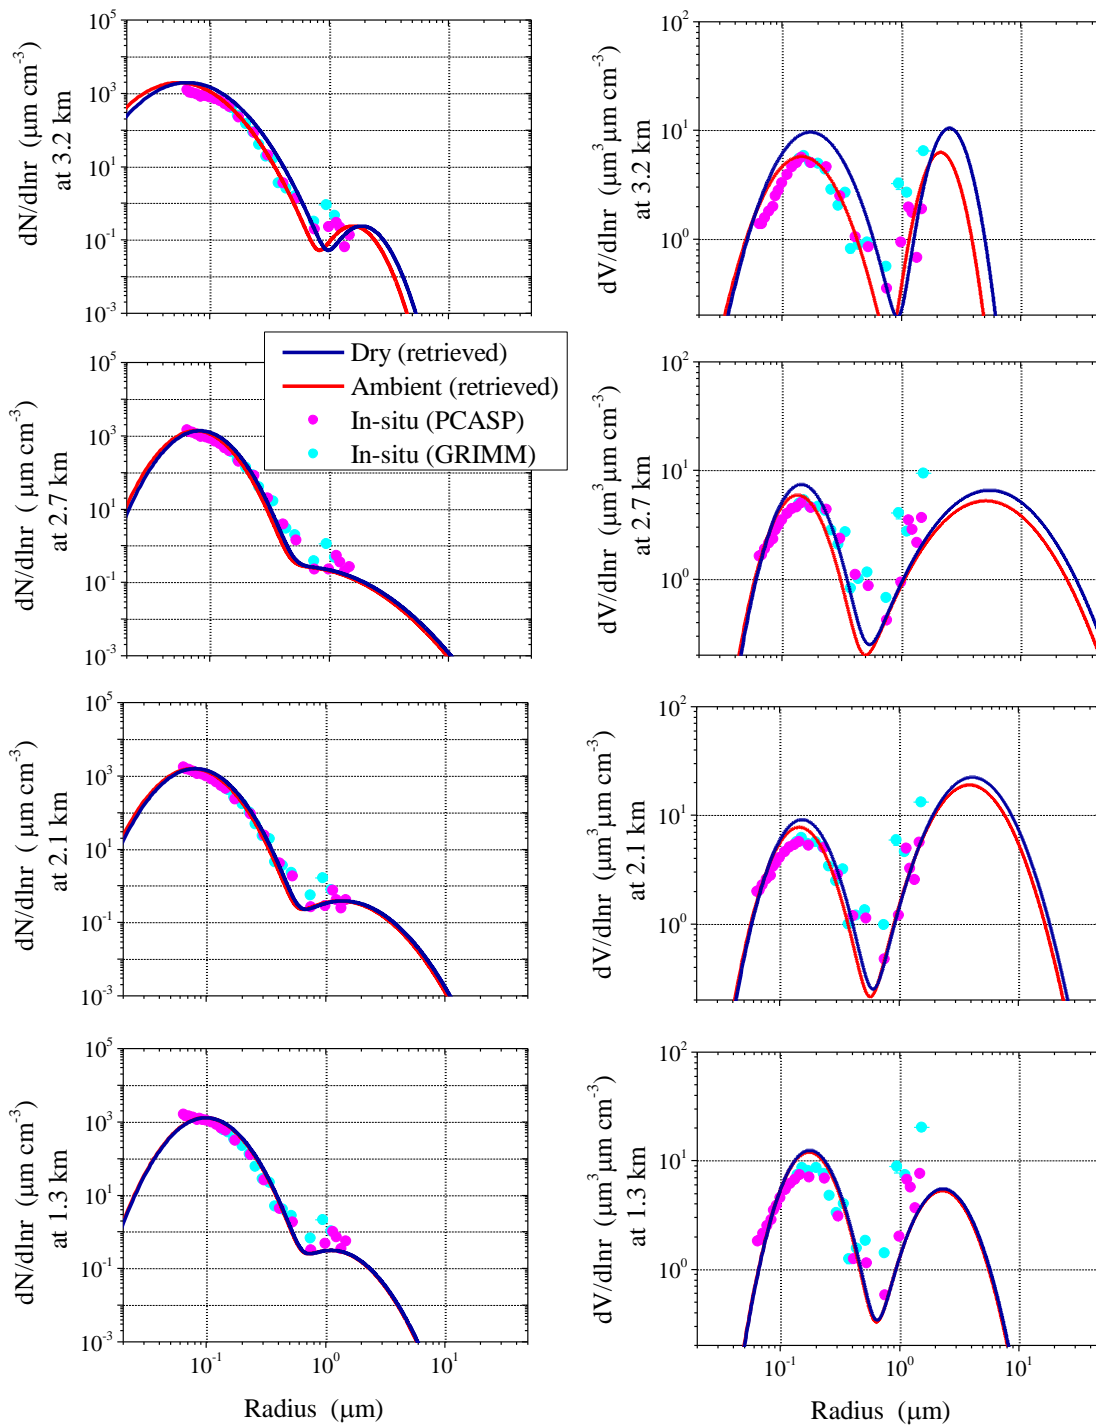

1

2

3 Figure 14. As for Fig. 12, for the flight segment above ocean, above Thessaloniki, on

4 September 9, 2011, at 00:45-01:50 UTC.

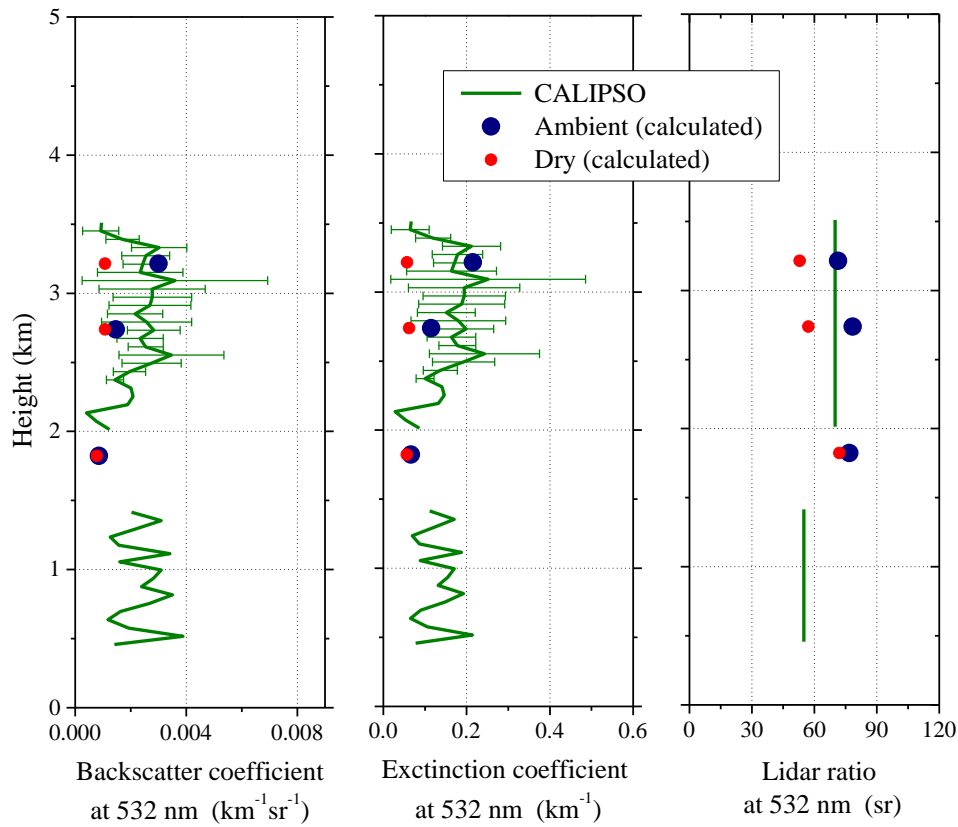

1

2

3 Figure 15. Backscatter (left), extinction (middle) and LR (right) at 532 nm, calculated from the  
 4 retrieved ambient particle properties of FAAM BAe-146 flight above land (dark blue circles),  
 5 and provided by the CALIPSO L2 product (green line) for the CALIPSO overpass above  
 6 Thessaloniki, Greece, on September 9, 2011, at 00:30 UTC. The errorbars in CALIPSO profiles  
 7 denote the spatial variability and not the uncertainty of the CALIPSO L2 product. The  
 8 calculated dry particle optical properties are also shown with red circles.

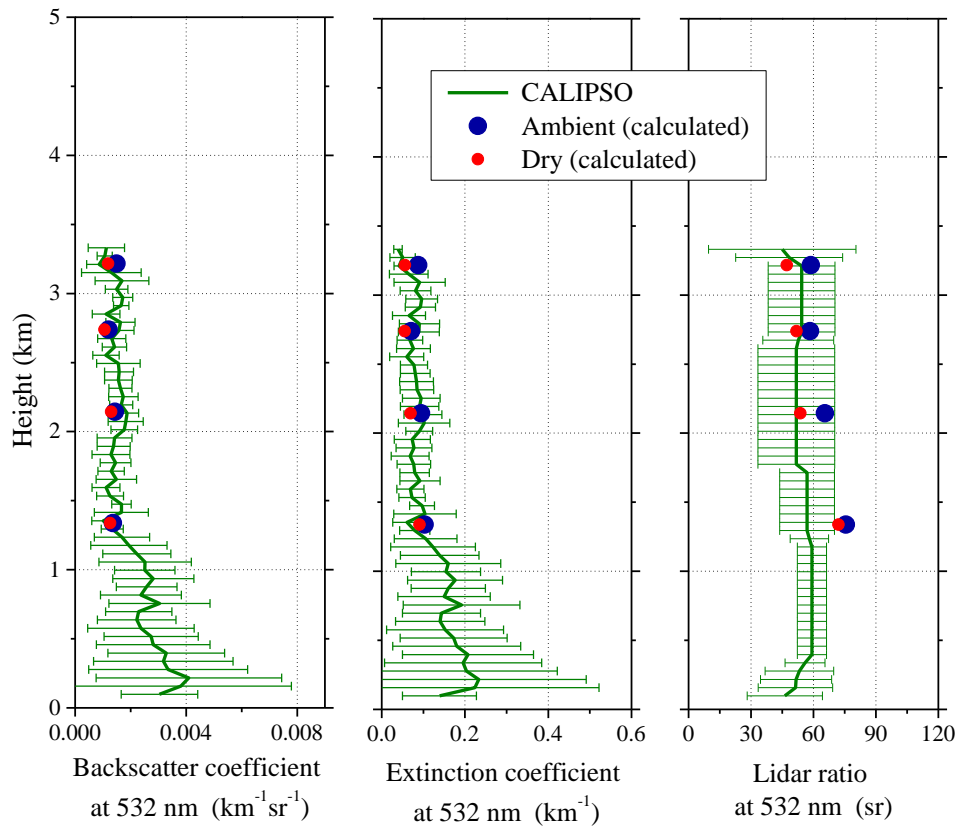

1

2

3 Figure 16. As for Fig.15, for the flight segment above the ocean.

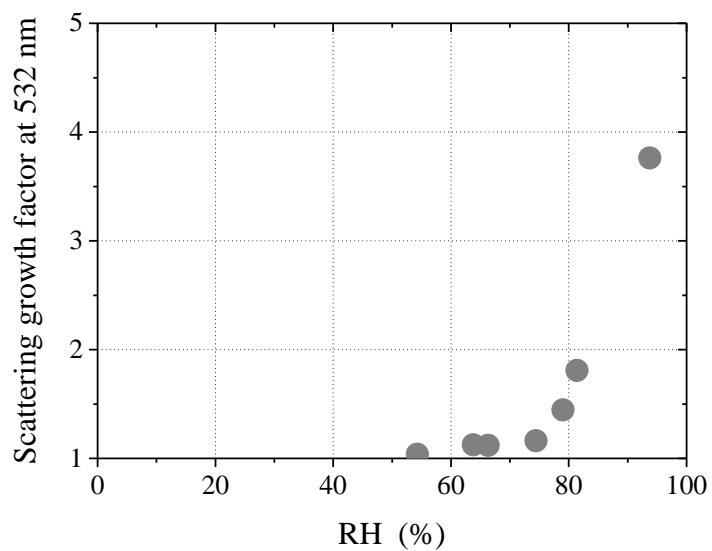

1

2

3 Figure 17. The scattering growth factor at 532 nm, acquired from the retrieved aerosol  
4 microphysical properties during the ACEMED campaign, above Thessaloniki, on 9 September  
5 2011.
